# Supplementary material for: Impact of molecular and packing structure on the charge-transport properties of hetero[8]circulenes
Source: Royal Society of Chemistry journal article supplement (doi:10.1039/d0tc03674a), 2020-12-15
Supplement: d0tc03674a1.pdf [file d0tc03674a1.pdf]

## Impact of molecular and packing structure on the charge-transport properties of hetero[8]circulenes

Nataliya N. Karaush-Karmazin <sup>\*,a</sup>, Gleb V. Baryshnikov<sup>a,b</sup>, Artem V. Kuklin<sup>b,c</sup>, Diana I. Saykova<sup>c</sup>, Hans Ågren<sup>b,d</sup> and Boris F. Minaev <sup>a</sup>

<sup>a</sup> *Department of Chemistry and Nanomaterials Science,*

*Bohdan Khmelnytsky National University, 18031, Cherkasy, Ukraine*

<sup>b</sup> *Division of Theoretical Chemistry and Biology, School of Engineering Sciences in Chemistry, Biotechnology and Health, KTH Royal Institute of Technology, 10691 Stockholm, Sweden*

<sup>c</sup> *Siberian Federal University, 79 Svobodny pr., Krasnoyarsk 660041, Russia*

<sup>d</sup> *College of Chemistry and Chemical Engineering, Henan University, Kaifeng, Henan 475004 P. R. China*

### Electronic Supplementary Information

#### List of Content

|                                                                                                                                 |          |
|---------------------------------------------------------------------------------------------------------------------------------|----------|
| <b>Figure S1.</b> Crystal structure and the pertinent dimer models extracted from the crystal structure of <b>5</b> circulene.  | <b>2</b> |
| <b>Figure S2.</b> Crystal structure and the pertinent dimer models extracted from the crystal structure of <b>12</b> circulene. | <b>3</b> |
| <b>Table S1.</b> HOMO, LUMO and HOMO-LUMO gap for hetero[8]circulenes                                                           | <b>4</b> |
| Optimized Cartesian coordinates for hetero[8]circulenes (Tables <b>S2–S28</b> )                                                 | <b>6</b> |

\*Corresponding author: N. Karaush-Karmazin karaush22@ukr.net

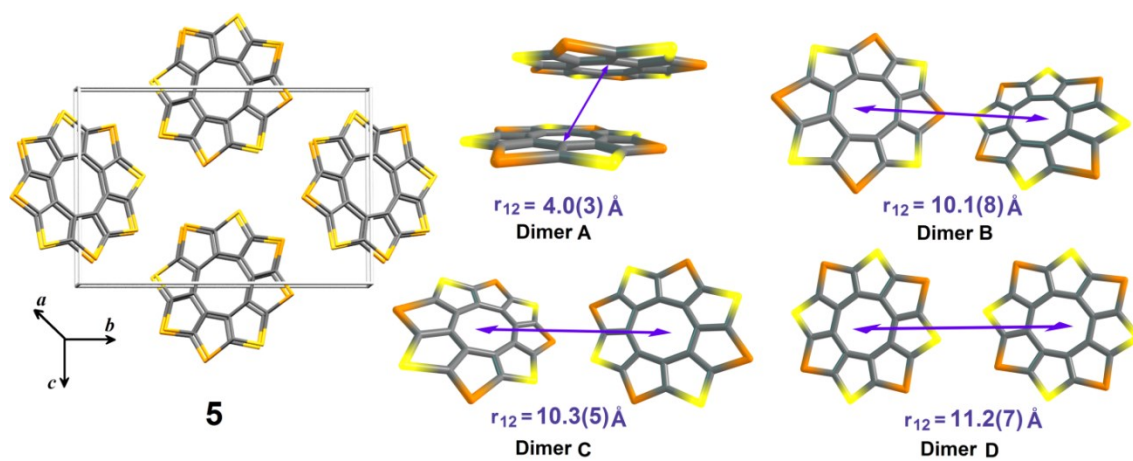

**Figure S1.** Crystal structure and the pertinent dimer models extracted from the crystal structure of **5** circulene. The intermolecular centroid-to-centroid distances ( $r_{12}$ ) are shown by purple arrows.

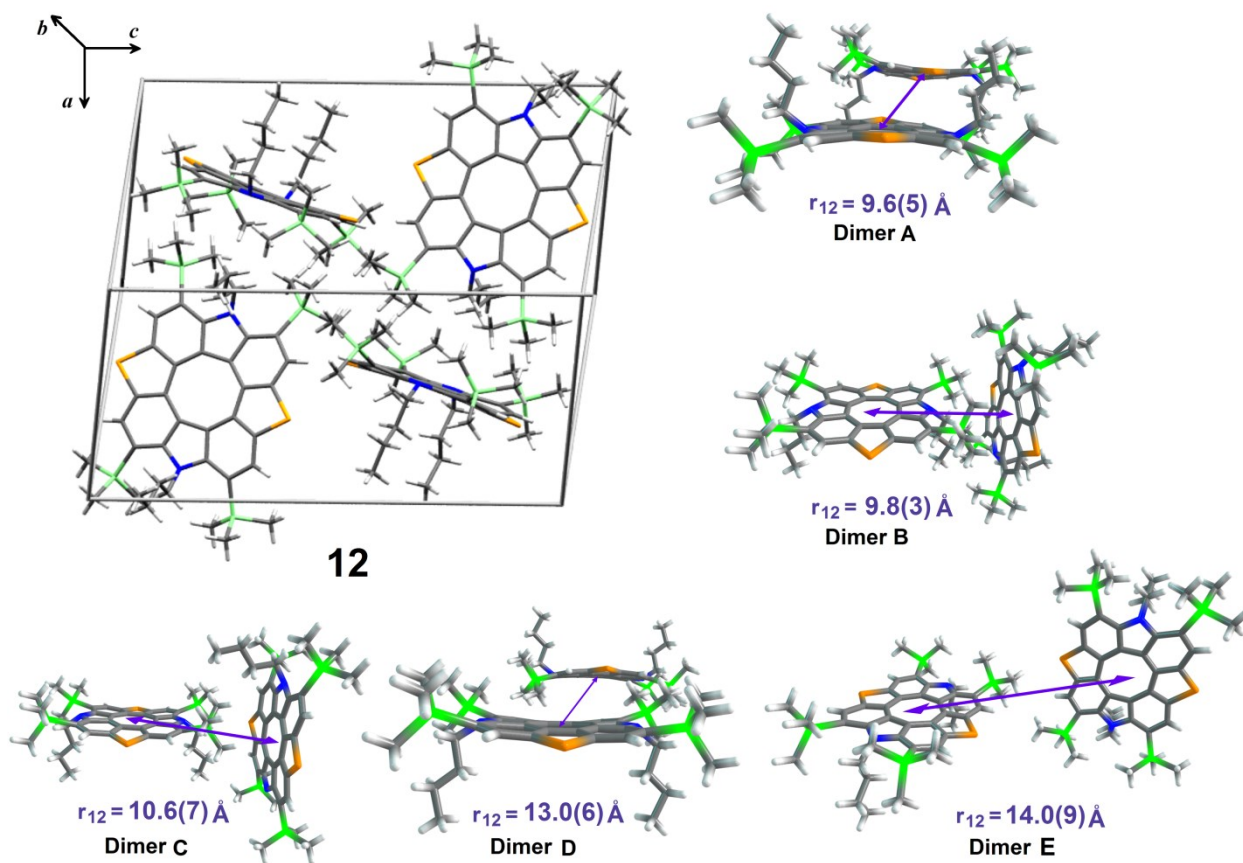

**Figure S2.** Crystal structure and the pertinent dimer models extracted from the crystal structure of **12** circulene. The intermolecular centroid-to-centroid distances ( $r_{12}$ ) are shown by purple arrows.

**Table S1.** HOMO, LUMO and HOMO-LUMO gap for hetero[8]circulenes 1–16

| Circulene | Method                                                                           | HOMO, eV                         | LUMO, eV                         | HOMO-LUMO gap, eV              |
|-----------|----------------------------------------------------------------------------------|----------------------------------|----------------------------------|--------------------------------|
| <b>1</b>  | B3LYP/6-311G(d,p)                                                                | -4.950                           | -1.410                           | 3.540                          |
|           | B3LYP/6-311++G(d,p)                                                              | -5.064                           | -1.540                           | 3.524                          |
| <b>2</b>  | B3LYP/6-311G(d,p)                                                                | -5.940                           | -1.900                           | 4.040                          |
|           | B3LYP/6-311++G(d,p)                                                              | -5.718                           | -1.997                           | 3.721                          |
| <b>3</b>  | B3LYP/6-311G(d,p),<br>calculation in gas phase                                   | -5.990                           | -2.350                           | 3.640                          |
|           | B3LYP/6-311++G(2df,2p),<br>calculation in acetonitrile<br>solution <sup>41</sup> | -6.27 <sup>41</sup>              | -2.71 <sup>41</sup>              | 3.55 <sup>41</sup>             |
| <b>4</b>  | B3LYP/6-311++G(d,p)                                                              | -5.926                           | -1.475                           | 4.450                          |
| <b>5</b>  | B3LYP/6-311++G(d,p)                                                              | -5.740                           | -1.478                           | 4.261                          |
|           | B3P86/6-31G(d,p) <sup>66</sup>                                                   | -6.19 <sup>66</sup>              | -1.66 <sup>66</sup>              | 4.54 <sup>66</sup>             |
| <b>6</b>  | B3LYP/6-311++G(d,p)                                                              | -0.205                           | -0.065                           | 3.808                          |
| <b>7</b>  | B3LYP/6-311++G(d,p)                                                              | -0.200                           | -0.055                           | 3.936                          |
| <b>8</b>  | B3LYP/6-31G(d)                                                                   | -5.249                           | -1.619                           | 3.629                          |
|           | B3LYP/6-311++G(d,p)                                                              | -5.542<br>[-5.96] <sup>99</sup>  | -1.944<br>[-2.97] <sup>99</sup>  | 3.597<br>[2.99] <sup>99</sup>  |
| <b>9</b>  | B3LYP/6-31G(d)                                                                   | -5.133                           | -1.642                           | 3.492                          |
|           | B3LYP/6-311++G(d,p)                                                              | -5.401<br>[-5.87] <sup>99</sup>  | -1.995<br>[-2.89] <sup>99</sup>  | 3.406<br>[2.98] <sup>99</sup>  |
| <b>10</b> | B3LYP/6-31G(d)                                                                   | -5.373                           | -1.682                           | 3.690                          |
|           | B3LYP/6-311++G(d,p)                                                              | -5.591                           | -1.961                           | 3.630                          |
| <b>11</b> | B3LYP/6-311++G(d,p) <sup>100</sup>                                               | -5.530<br>[ 5.91] <sup>100</sup> | -2.180<br>[ 3.18] <sup>100</sup> | 3.350<br>[2.73] <sup>100</sup> |
| <b>12</b> | B3LYP/6-311++G(d,p) <sup>100</sup>                                               | -5.450<br>[ 5.98] <sup>100</sup> | -2.200<br>[ 3.06] <sup>100</sup> | 3.250<br>[2.92] <sup>100</sup> |
| <b>13</b> | B3LYP/6-311++G(d,p)                                                              | -5.744                           | -2.108                           | 3.636                          |
| <b>14</b> | B3LYP/6-31G(d)                                                                   | -5.495                           | -1.784                           | 3.711                          |
|           | B3LYP/6-311++G(d,p)                                                              | -5.780                           | -2.106                           | 3.674                          |
| <b>15</b> | B3LYP/6-31G(d)                                                                   | -5.156                           | -1.581                           | 3.575                          |
|           | B3LYP/6-311++G(d,p)                                                              | -5.431<br>[-5.77] <sup>103</sup> | -1.909<br>[-2.58] <sup>103</sup> | 3.521<br>[3.19] <sup>103</sup> |
| <b>16</b> | B3LYP/6-311++G(d,p)                                                              | -5.240                           | -1.642                           | 3.598                          |

<sup>a</sup> Experimental HOMO and LUMO values are given in square brackets.

The orbital energy levels of highest occupied (HOMO) and lowest unoccupied (LUMO) molecular orbitals were calculated for isolated molecules in gas phase with B3LYP functional and different basis sets (Table S1). As one can see from the Table above the B3LYP functional and extended 6-311++G(d,p) basis set provides excellent agreement with experimental  $E_{\text{HOMO}}$  (for those hetero[8]circulenes for which these data are available), while  $E_{\text{LUMO}}$  are calculated with less accuracy that is a known limitation of DFT method itself (*J. Phys. Chem. A* 2007, 111,

8, 1554–1561). For example, in the case of a pair of heterocirculenes **8** and **9** (in these molecules, sulfur heteroatoms are replaced by selenium heteroatoms) the absolute HOMO energy levels correlate well with experimental values  $-5.542$  (exp.  $-5.96$  eV) for **8** and  $-5.401$  (exp.  $-5.87$  eV) for circulene **9**, while for LUMO energy theory gives a bit worse agreement. Regarding IP and EA values for solid state circulenes, these data are not presented in any literature we know; all the experimental results correspond to solution phase. In previous report, Nguyen et. al. (*RSC Adv.*, 2015, 5, 24167-24174) have examined the reduction and oxidation potentials and energy levels of frontier orbitals for a series of O-, S-, Se- and NH-containing heterocirculenes using the SMD/IEF-PCM solvation model in acetonitrile solvent. It was found that the calculated oxidation and reduction potentials are close to the experimental values. The same pattern is observed for the other hetero[8]circulenes.

**Table S2.** The optimized Cartesian coordinates of the tetraoxa[8]circulene **1** in the ground singlet state calculated at the B3LYP/DZP level of theory

| Atomic<br>Number | Coordinates (Angstroms) |             |              |
|------------------|-------------------------|-------------|--------------|
|                  | X                       | Y           | Z            |
| 1                | -0.292482000            | 8.416185000 | 9.600595000  |
| 1                | 8.022629000             | 5.646576000 | 3.184591000  |
| 6                | 1.499842000             | 7.508997000 | 8.888441000  |
| 1                | 1.458372000             | 7.991049000 | 7.921148000  |
| 8                | 3.935471000             | 4.433845000 | 11.876198000 |
| 8                | 8.572444000             | 1.922457000 | 10.421891000 |
| 6                | 3.719315000             | 5.126851000 | 10.703490000 |
| 6                | 4.719932000             | 4.865502000 | 9.787618000  |
| 8                | 3.717229000             | 6.865449000 | 6.980770000  |
| 6                | 8.569778000             | 3.660192000 | 6.698755000  |
| 6                | 7.569594000             | 3.922141000 | 7.614913000  |
| 6                | 6.674588000             | 4.831822000 | 6.980093000  |
| 8                | 8.353206000             | 4.352692000 | 5.525805000  |
| 6                | 7.187311000             | 5.063380000 | 5.718513000  |
| 6                | 6.583482000             | 5.918086000 | 4.761038000  |
| 6                | 6.465022000             | 6.989349000 | 2.597334000  |
| 1                | 6.877326000             | 7.155487000 | 1.610681000  |
| 6                | 5.275266000             | 7.638590000 | 2.973395000  |
| 1                | 4.781383000             | 8.299974000 | 2.273614000  |
| 6                | 4.734887000             | 7.439125000 | 4.222365000  |
| 1                | 3.819497000             | 7.937208000 | 4.511535000  |
| 6                | 5.365125000             | 6.581125000 | 5.145009000  |
| 6                | 4.867075000             | 6.322104000 | 6.447440000  |
| 6                | 5.478493000             | 5.479283000 | 7.355326000  |
| 6                | 4.664022000             | 5.493210000 | 8.524798000  |
| 6                | 3.611279000             | 6.345295000 | 8.253711000  |
| 6                | 2.569204000             | 6.636628000 | 9.170212000  |
| 6                | 2.625715000             | 5.995777000 | 10.458271000 |
| 6                | 1.608647000             | 6.259083000 | 11.396288000 |
| 6                | 7.107701000             | 6.145593000 | 3.473497000  |
| 1                | 1.651122000             | 5.777073000 | 12.363619000 |
| 6                | 5.101549000             | 3.723425000 | 11.683685000 |
| 6                | 0.578280000             | 7.116151000 | 11.086954000 |
| 1                | -0.196841000            | 7.309603000 | 11.816734000 |
| 6                | 5.705337000             | 2.868619000 | 12.641104000 |
| 6                | 0.523783000             | 7.743447000 | 9.829001000  |
| 6                | 5.180793000             | 2.640523000 | 13.928413000 |
| 1                | 4.265544000             | 3.139047000 | 14.217153000 |
| 6                | 5.823688000             | 1.796955000 | 14.804600000 |
| 1                | 5.411187000             | 1.630414000 | 15.791101000 |
| 6                | 7.013846000             | 1.148345000 | 14.428764000 |
| 1                | 7.507816000             | 0.487053000 | 15.128574000 |
| 6                | 7.554470000             | 1.348275000 | 13.179977000 |
| 1                | 8.470159000             | 0.850646000 | 12.890984000 |
| 6                | 6.924119000             | 2.206206000 | 12.257357000 |
| 6                | 7.422520000             | 2.465717000 | 10.955147000 |
| 6                | 6.811220000             | 3.308673000 | 10.047313000 |
| 6                | 7.625736000             | 3.294772000 | 8.877883000  |
| 6                | 8.678424000             | 2.442636000 | 9.148960000  |
| 6                | 9.720247000             | 2.150933000 | 8.232283000  |
| 6                | 9.663346000             | 2.791210000 | 6.943935000  |
| 6                | 10.680021000            | 2.527284000 | 6.005671000  |
| 1                | 10.637247000            | 3.008789000 | 5.038103000  |
| 6                | 5.614899000             | 3.955749000 | 10.422444000 |
| 6                | 11.710427000            | 1.670245000 | 6.315040000  |
| 1                | 12.485176000            | 1.476338000 | 5.584982000  |
| 6                | 11.765422000            | 1.043653000 | 7.573314000  |
| 1                | 12.581731000            | 0.371000000 | 7.801781000  |
| 6                | 10.789767000            | 1.278828000 | 8.514116000  |
| 1                | 10.831615000            | 0.797340000 | 9.481674000  |

**Table S3.** The optimized Cartesian coordinates of the tetraoxa[8]circulene **1** cation in the ground singlet state calculated at the B3LYP/DZP level of theory

| Atomic<br>Number | Coordinates (Angstroms) |             |              |
|------------------|-------------------------|-------------|--------------|
|                  | X                       | Y           | Z            |
| 8                | 8.341465000             | 4.362267000 | 5.526544000  |
| 8                | 3.729265000             | 6.863737000 | 6.972710000  |
| 6                | 8.565243000             | 3.661730000 | 6.703776000  |
| 6                | 7.562490000             | 3.925304000 | 7.617931000  |
| 6                | 6.670885000             | 4.831532000 | 6.988372000  |
| 6                | 7.189938000             | 5.064376000 | 5.716454000  |
| 6                | 6.582563000             | 5.923001000 | 4.755641000  |
| 6                | 7.106763000             | 6.144805000 | 3.475837000  |
| 1                | 8.020817000             | 5.646850000 | 3.183966000  |
| 6                | 6.459216000             | 6.993361000 | 2.592951000  |
| 1                | 6.872786000             | 7.156560000 | 1.607101000  |
| 6                | 5.277932000             | 7.638777000 | 2.966095000  |
| 1                | 4.782424000             | 8.299437000 | 2.267912000  |
| 6                | 4.734844000             | 7.438955000 | 4.223773000  |
| 1                | 3.819716000             | 7.938010000 | 4.510536000  |
| 6                | 5.366062000             | 6.585303000 | 5.138876000  |
| 6                | 4.865176000             | 6.327077000 | 6.445883000  |
| 6                | 5.483010000             | 5.475127000 | 7.361177000  |
| 6                | 4.671326000             | 5.490263000 | 8.522799000  |
| 6                | 3.615879000             | 6.343218000 | 8.255219000  |
| 6                | 2.578102000             | 6.634838000 | 9.163499000  |
| 6                | 2.634462000             | 5.989107000 | 10.458585000 |
| 6                | 1.615783000             | 6.251159000 | 11.397443000 |
| 1                | 1.654741000             | 5.769289000 | 12.364226000 |
| 6                | 0.590269000             | 7.107163000 | 11.083737000 |
| 1                | -0.186911000            | 7.302040000 | 11.810068000 |
| 6                | 0.536025000             | 7.738119000 | 9.822553000  |
| 1                | -0.281600000            | 8.409835000 | 9.599190000  |
| 6                | 1.507052000             | 7.508866000 | 8.881093000  |
| 1                | 1.464109000             | 7.992844000 | 7.915614000  |
| 8                | 3.947845000             | 4.425018000 | 11.875838000 |
| 8                | 8.559927000             | 1.923405000 | 10.429607000 |
| 6                | 3.724051000             | 5.125566000 | 10.698587000 |
| 6                | 4.726881000             | 4.862128000 | 9.784509000  |
| 6                | 5.618520000             | 3.955923000 | 10.414064000 |
| 6                | 5.099416000             | 3.723005000 | 11.685958000 |
| 6                | 5.706756000             | 2.864323000 | 12.646742000 |
| 6                | 5.182531000             | 2.642482000 | 13.926527000 |
| 1                | 4.268503000             | 3.140469000 | 14.218424000 |
| 6                | 5.830014000             | 1.793833000 | 14.809373000 |
| 1                | 5.416418000             | 1.630614000 | 15.795218000 |
| 6                | 7.011251000             | 1.148345000 | 14.436205000 |
| 1                | 7.506708000             | 0.487609000 | 15.134344000 |
| 6                | 7.554358000             | 1.348202000 | 13.178543000 |
| 1                | 8.469455000             | 0.849097000 | 12.891741000 |
| 6                | 6.923218000             | 2.201960000 | 12.263481000 |
| 6                | 7.424119000             | 2.460211000 | 10.956499000 |
| 6                | 6.806375000             | 3.312293000 | 10.041250000 |
| 6                | 7.618039000             | 3.297116000 | 8.879611000  |
| 6                | 8.673340000             | 2.443941000 | 9.147109000  |
| 6                | 9.710959000             | 2.152122000 | 8.238745000  |
| 6                | 9.654591000             | 2.797882000 | 6.943684000  |
| 6                | 10.673128000            | 2.535647000 | 6.004706000  |
| 1                | 10.634169000            | 3.017563000 | 5.037947000  |
| 6                | 11.698477000            | 1.679400000 | 6.318262000  |
| 1                | 12.475541000            | 1.484355000 | 5.591854000  |
| 6                | 11.752713000            | 1.048391000 | 7.579430000  |
| 1                | 12.570207000            | 0.376473000 | 7.802697000  |
| 6                | 10.781858000            | 1.277845000 | 8.521006000  |
| 1                | 10.824801000            | 0.793830000 | 9.486476000  |

**Table S4.** The optimized Cartesian coordinates of the tetraoxa[8]circulene **1** anion in the ground singlet state calculated at the B3LYP/DZP level of theory

| Atomic<br>Number | X            | Coordinates (Angstroms)<br>Y | Z            |
|------------------|--------------|------------------------------|--------------|
| 1                | -0.299150000 | 8.422548000                  | 9.597379000  |
| 1                | 8.023760000  | 5.649145000                  | 3.175553000  |
| 6                | 1.491874000  | 7.514338000                  | 8.889712000  |
| 1                | 1.450176000  | 7.996902000                  | 7.922246000  |
| 8                | 3.930321000  | 4.434379000                  | 11.884297000 |
| 8                | 8.578566000  | 1.915981000                  | 10.426171000 |
| 6                | 3.711631000  | 5.130477000                  | 10.707763000 |
| 6                | 4.722677000  | 4.862196000                  | 9.790589000  |
| 8                | 3.711045000  | 6.871863000                  | 6.976443000  |
| 6                | 8.577474000  | 3.656561000                  | 6.694469000  |
| 6                | 7.566756000  | 3.925338000                  | 7.611875000  |
| 6                | 6.678005000  | 4.828242000                  | 6.981555000  |
| 8                | 8.358401000  | 4.352199000                  | 5.517718000  |
| 6                | 7.188209000  | 5.066268000                  | 5.709404000  |
| 6                | 6.590144000  | 5.913400000                  | 4.759894000  |
| 6                | 6.469840000  | 6.989905000                  | 2.588877000  |
| 1                | 6.882775000  | 7.155592000                  | 1.602220000  |
| 6                | 5.270449000  | 7.644670000                  | 2.967924000  |
| 1                | 4.776295000  | 8.306530000                  | 2.268501000  |
| 6                | 4.733317000  | 7.444085000                  | 4.214250000  |
| 1                | 3.817716000  | 7.942736000                  | 4.503304000  |
| 6                | 5.358057000  | 6.584051000                  | 5.148073000  |
| 6                | 4.864752000  | 6.327003000                  | 6.439278000  |
| 6                | 5.474666000  | 5.479693000                  | 7.358981000  |
| 6                | 4.666207000  | 5.493622000                  | 8.519978000  |
| 6                | 3.603084000  | 6.350680000                  | 8.254405000  |
| 6                | 2.569945000  | 6.639879000                  | 9.162657000  |
| 6                | 2.627242000  | 5.991666000                  | 10.465246000 |
| 6                | 1.600888000  | 6.262325000                  | 11.400284000 |
| 6                | 7.108635000  | 6.148524000                  | 3.464684000  |
| 1                | 1.643166000  | 5.779918000                  | 12.367877000 |
| 6                | 5.100647000  | 3.720521000                  | 11.692767000 |
| 6                | 0.571971000  | 7.116746000                  | 11.094377000 |
| 1                | -0.203071000 | 7.309476000                  | 11.824676000 |
| 6                | 5.698675000  | 2.873279000                  | 12.642221000 |
| 6                | 0.517000000  | 7.749538000                  | 9.826195000  |
| 6                | 5.179876000  | 2.637612000                  | 13.937213000 |
| 1                | 4.264469000  | 3.136552000                  | 14.226206000 |
| 6                | 5.818851000  | 1.796363000                  | 14.813019000 |
| 1                | 5.405719000  | 1.630294000                  | 15.799538000 |
| 6                | 7.018584000  | 1.142162000                  | 14.434177000 |
| 1                | 7.512797000  | 0.480357000                  | 15.133602000 |
| 6                | 7.555951000  | 1.343194000                  | 13.188016000 |
| 1                | 8.471817000  | 0.844940000                  | 12.899106000 |
| 6                | 6.931122000  | 2.203199000                  | 12.254254000 |
| 6                | 7.424754000  | 2.460702000                  | 10.963233000 |
| 6                | 6.814926000  | 3.308095000                  | 10.043587000 |
| 6                | 7.623441000  | 3.294192000                  | 8.882602000  |
| 6                | 8.686534000  | 2.437161000                  | 9.148213000  |
| 6                | 9.719516000  | 2.147687000                  | 8.239828000  |
| 6                | 9.661849000  | 2.795385000                  | 6.936991000  |
| 6                | 10.687916000 | 2.524192000                  | 6.001759000  |
| 1                | 10.645388000 | 3.006125000                  | 5.033943000  |
| 6                | 5.611402000  | 3.959216000                  | 10.420914000 |
| 6                | 11.716894000 | 1.669874000                  | 6.307768000  |
| 1                | 12.491650000 | 1.476784000                  | 5.577255000  |
| 6                | 11.772330000 | 1.037731000                  | 7.576247000  |
| 1                | 12.588568000 | 0.364869000                  | 7.805169000  |
| 6                | 10.797738000 | 1.273536000                  | 8.512893000  |
| 1                | 10.839761000 | 0.791500000                  | 9.480620000  |



**Table S5.** The optimized Cartesian coordinates of the tetraaza[8]circulene **2** in the ground singlet state calculated at the B3LYP/DZP level of theory

| Atomic Number | X            | Y            | Z            |
|---------------|--------------|--------------|--------------|
| 6             | 0.890954000  | -4.900935000 | 2.629312000  |
| 1             | 1.458752000  | -5.503103000 | 1.930850000  |
| 6             | 0.496929000  | -3.596625000 | 2.272385000  |
| 6             | -0.253370000 | -2.823818000 | 3.210535000  |
| 6             | -0.639421000 | -1.509355000 | 2.820679000  |
| 6             | -0.327697000 | -0.925806000 | 1.584614000  |
| 6             | 0.424581000  | -1.695630000 | 0.650890000  |
| 6             | 0.806580000  | -2.992896000 | 1.020499000  |
| 6             | -1.524978000 | 0.554464000  | 2.830021000  |
| 6             | -0.891464000 | 0.388223000  | 1.590538000  |
| 6             | -0.931565000 | 1.472366000  | 0.666553000  |
| 6             | -1.603932000 | 2.641731000  | 1.049487000  |
| 6             | -2.256126000 | 2.821314000  | 2.302975000  |
| 6             | -2.213143000 | 1.735327000  | 3.230427000  |
| 6             | -2.846798000 | 1.885182000  | 4.479608000  |
| 1             | -2.823783000 | 1.074693000  | 5.197672000  |
| 6             | -3.500606000 | 3.050755000  | 4.811226000  |
| 1             | -3.981112000 | 3.145821000  | 5.776571000  |
| 6             | -3.546626000 | 4.116124000  | 3.898345000  |
| 1             | -4.063509000 | 5.030312000  | 4.160889000  |
| 6             | -2.934736000 | 3.999929000  | 2.670390000  |
| 1             | -2.982291000 | 4.832881000  | 1.979602000  |
| 7             | -1.361934000 | -0.601035000 | 3.559765000  |
| 1             | -1.721669000 | -0.759893000 | 4.483666000  |
| 7             | -1.518193000 | 3.548954000  | 0.018074000  |
| 1             | -1.904892000 | 4.475434000  | 0.026496000  |
| 6             | 0.567959000  | 3.393678000  | -4.459999000 |
| 1             | 1.134044000  | 2.823091000  | -5.186043000 |
| 6             | 0.166690000  | 4.670867000  | -4.781550000 |
| 1             | 0.417977000  | 5.089919000  | -5.747481000 |
| 6             | -0.568720000 | 5.431135000  | -3.858405000 |
| 1             | -0.883041000 | 6.435043000  | -4.113986000 |
| 6             | -0.890954000 | 4.900935000  | -2.629312000 |
| 1             | -1.458752000 | 5.503103000  | -1.930850000 |
| 6             | -0.496929000 | 3.596625000  | -2.272385000 |
| 6             | 0.253370000  | 2.823818000  | -3.210535000 |
| 6             | 0.639421000  | 1.509355000  | -2.820679000 |
| 6             | 0.327697000  | 0.925806000  | -1.584614000 |
| 6             | -0.424581000 | 1.695630000  | -0.650890000 |
| 6             | -0.806580000 | 2.992896000  | -1.020499000 |
| 6             | 1.524978000  | -0.554464000 | -2.830021000 |
| 6             | 0.891464000  | -0.388223000 | -1.590538000 |
| 6             | 0.931565000  | -1.472366000 | -0.666553000 |
| 6             | 1.603932000  | -2.641731000 | -1.049487000 |
| 6             | 2.256126000  | -2.821314000 | -2.302975000 |
| 6             | 2.213143000  | -1.735327000 | -3.230427000 |
| 6             | 2.846798000  | -1.885182000 | -4.479608000 |
| 1             | 2.823783000  | -1.074693000 | -5.197672000 |
| 6             | 3.500606000  | -3.050755000 | -4.811226000 |
| 1             | 3.981112000  | -3.145821000 | -5.776571000 |
| 6             | 3.546626000  | -4.116124000 | -3.898345000 |
| 1             | 4.063509000  | -5.030312000 | -4.160889000 |
| 6             | 2.934736000  | -3.999929000 | -2.670390000 |
| 1             | 2.982291000  | -4.832881000 | -1.979602000 |
| 7             | 1.361934000  | 0.601035000  | -3.559765000 |
| 1             | 1.721669000  | 0.759893000  | -4.483666000 |
| 7             | 1.518193000  | -3.548954000 | -0.018074000 |
| 1             | 1.904892000  | -4.475434000 | -0.026496000 |
| 6             | -0.567959000 | -3.393678000 | 4.459999000  |
| 1             | -0.417977000 | -5.089919000 | 5.747481000  |
| 6             | 0.568720000  | -5.431135000 | 3.858405000  |
| 1             | 0.883041000  | -6.435043000 | 4.113986000  |
| 6             | -0.567959000 | -3.393678000 | 4.459999000  |
| 1             | -1.134044000 | -2.823091000 | 5.186043000  |

**Table S6.** The optimized Cartesian coordinates of the tetraaza[8]circulene **2** cation in the ground singlet state calculated at the B3LYP/DZP level of theory

| Atomic Number | X            | Y            | Z            |
|---------------|--------------|--------------|--------------|
| 6             | 0.898108000  | -4.905673000 | 2.617789000  |
| 1             | 1.464446000  | -5.507683000 | 1.919808000  |
| 6             | 0.500878000  | -3.599987000 | 2.267263000  |
| 6             | -0.249910000 | -2.824899000 | 3.205232000  |
| 6             | -0.636160000 | -1.507355000 | 2.810843000  |
| 6             | -0.324364000 | -0.924466000 | 1.574699000  |
| 6             | 0.424430000  | -1.689494000 | 0.645164000  |
| 6             | 0.809888000  | -2.998062000 | 1.019212000  |
| 6             | -1.522468000 | 0.555268000  | 2.820320000  |
| 6             | -0.888410000 | 0.390041000  | 1.580738000  |
| 6             | -0.927441000 | 1.468052000  | 0.661123000  |
| 6             | -1.606796000 | 2.647510000  | 1.048176000  |
| 6             | -2.257155000 | 2.826168000  | 2.298251000  |
| 6             | -2.213067000 | 1.738642000  | 3.225162000  |
| 6             | -2.843799000 | 1.888706000  | 4.469950000  |
| 1             | -2.824789000 | 1.083410000  | 5.192259000  |
| 6             | -3.496817000 | 3.059598000  | 4.796754000  |
| 1             | -3.976780000 | 3.156131000  | 5.761427000  |
| 6             | -3.544762000 | 4.124993000  | 3.886902000  |
| 1             | -4.061167000 | 5.037489000  | 4.151671000  |
| 6             | -2.933499000 | 4.008574000  | 2.659370000  |
| 1             | -2.980620000 | 4.840532000  | 1.969180000  |
| 7             | -1.357828000 | -0.598851000 | 3.542484000  |
| 1             | -1.719669000 | -0.758947000 | 4.468029000  |
| 7             | -1.520622000 | 3.554648000  | 0.018716000  |
| 1             | -1.908309000 | 4.482213000  | 0.026778000  |
| 6             | 0.562942000  | 3.393076000  | -4.450067000 |
| 1             | 1.128150000  | 2.829254000  | -5.180425000 |
| 6             | 0.157856000  | 4.673432000  | -4.766542000 |
| 1             | 0.408317000  | 5.092833000  | -5.731742000 |
| 6             | -0.576510000 | 5.435232000  | -3.846505000 |
| 1             | -0.889007000 | 6.437999000  | -4.103948000 |
| 6             | -0.898108000 | 4.905673000  | -2.617789000 |
| 1             | -1.464446000 | 5.507683000  | -1.919808000 |
| 6             | -0.500878000 | 3.599987000  | -2.267263000 |
| 6             | 0.249910000  | 2.824899000  | -3.205232000 |
| 6             | 0.636160000  | 1.507355000  | -2.810843000 |
| 6             | 0.324364000  | 0.924466000  | -1.574699000 |
| 6             | -0.424430000 | 1.689494000  | -0.645164000 |
| 6             | -0.809888000 | 2.998062000  | -1.019212000 |
| 6             | 1.522468000  | -0.555268000 | -2.820320000 |
| 6             | 0.888410000  | -0.390041000 | -1.580738000 |
| 6             | 0.927441000  | -1.468052000 | -0.661123000 |
| 6             | 1.606796000  | -2.647510000 | -1.048176000 |
| 6             | 2.257155000  | -2.826168000 | -2.298251000 |
| 6             | 2.213067000  | -1.738642000 | -3.225162000 |
| 6             | 2.843799000  | -1.888706000 | -4.469950000 |
| 1             | 2.824789000  | -1.083410000 | -5.192259000 |
| 6             | 3.496817000  | -3.059598000 | -4.796754000 |
| 1             | 3.976780000  | -3.156131000 | -5.761427000 |
| 6             | 3.544762000  | -4.124993000 | -3.886902000 |
| 1             | 4.061167000  | -5.037489000 | -4.151671000 |
| 6             | 2.933499000  | -4.008574000 | -2.659370000 |
| 1             | 2.980620000  | -4.840532000 | -1.969180000 |
| 7             | 1.357828000  | 0.598851000  | -3.542484000 |
| 1             | 1.719669000  | 0.758947000  | -4.468029000 |
| 7             | 1.520622000  | -3.554648000 | -0.018716000 |
| 1             | 1.908309000  | -4.482213000 | -0.026778000 |
| 6             | -0.157856000 | -4.673432000 | 4.766542000  |
| 1             | -0.408317000 | -5.092833000 | 5.731742000  |
| 6             | 0.576510000  | -5.435232000 | 3.846505000  |
| 1             | 0.889007000  | -6.437999000 | 4.103948000  |
| 6             | -0.562942000 | -3.393076000 | 4.450067000  |
| 1             | -1.128150000 | -2.829254000 | 5.180425000  |

**Table S7.** The optimized Cartesian coordinates of the tetraaza[8]circulene **2** anion in the ground singlet state calculated at the B3LYP/DZP level of theory

| Atomic<br>Number | Coordinates (Angstroms) |              |              |
|------------------|-------------------------|--------------|--------------|
|                  | X                       | Y            | Z            |
| 6                | 0.892071000             | -4.909191000 | 2.633811000  |
| 1                | 1.460302000             | -5.512647000 | 1.935672000  |
| 6                | 0.502157000             | -3.601383000 | 2.266956000  |
| 6                | -0.257873000            | -2.818988000 | 3.216511000  |
| 6                | -0.639117000            | -1.515949000 | 2.828484000  |
| 6                | -0.329286000            | -0.922418000 | 1.586254000  |
| 6                | 0.427399000             | -1.696252000 | 0.647815000  |
| 6                | 0.809175000             | -3.000700000 | 1.026682000  |
| 6                | -1.530282000            | 0.558682000  | 2.837763000  |
| 6                | -0.890747000            | 0.384487000  | 1.591969000  |
| 6                | -0.931645000            | 1.474211000  | 0.663055000  |
| 6                | -1.610640000            | 2.647844000  | 1.054584000  |
| 6                | -2.257397000            | 2.827747000  | 2.297092000  |
| 6                | -2.213008000            | 1.728772000  | 3.236334000  |
| 6                | -2.850205000            | 1.889268000  | 4.487884000  |
| 1                | -2.826283000            | 1.079384000  | 5.207723000  |
| 6                | -3.504200000            | 3.051419000  | 4.821503000  |
| 1                | -3.983369000            | 3.145800000  | 5.787557000  |
| 6                | -3.551419000            | 4.125654000  | 3.900357000  |
| 1                | -4.068425000            | 5.040161000  | 4.161521000  |
| 6                | -2.941050000            | 4.006045000  | 2.674609000  |
| 1                | -2.990424000            | 4.839530000  | 1.983423000  |
| 7                | -1.362986000            | -0.601568000 | 3.566902000  |
| 1                | -1.724482000            | -0.761426000 | 4.488782000  |
| 7                | -1.523206000            | 3.554468000  | 0.017149000  |
| 1                | -1.909756000            | 4.479822000  | 0.025162000  |
| 6                | 0.569256000             | 3.399692000  | -4.467107000 |
| 1                | 1.135685000             | 2.829698000  | -5.194508000 |
| 6                | 0.170559000             | 4.674732000  | -4.790738000 |
| 1                | 0.423090000             | 5.092574000  | -5.756851000 |
| 6                | -0.570713000            | 5.441777000  | -3.859592000 |
| 1                | -0.884909000            | 6.446100000  | -4.113553000 |
| 6                | -0.892071000            | 4.909191000  | -2.633811000 |
| 1                | -1.460302000            | 5.512647000  | -1.935672000 |
| 6                | -0.502157000            | 3.601383000  | -2.266956000 |
| 6                | 0.257873000             | 2.818988000  | -3.216511000 |
| 6                | 0.639117000             | 1.515949000  | -2.828484000 |
| 6                | 0.329286000             | 0.922418000  | -1.586254000 |
| 6                | -0.427399000            | 1.696252000  | -0.647815000 |
| 6                | -0.809175000            | 3.000700000  | -1.026682000 |
| 6                | 1.530282000             | -0.558682000 | -2.837763000 |
| 6                | 0.890747000             | -0.384487000 | -1.591969000 |
| 6                | 0.931645000             | -1.474211000 | -0.663055000 |
| 6                | 1.610640000             | -2.647844000 | -1.054584000 |
| 6                | 2.257397000             | -2.827747000 | -2.297092000 |
| 6                | 2.213008000             | -1.728772000 | -3.236334000 |
| 6                | 2.850205000             | -1.889268000 | -4.487884000 |
| 1                | 2.826283000             | -1.079384000 | -5.207723000 |
| 6                | 3.504200000             | -3.051419000 | -4.821503000 |
| 1                | 3.983369000             | -3.145800000 | -5.787557000 |
| 6                | 3.551419000             | -4.125654000 | -3.900357000 |
| 1                | 4.068425000             | -5.040161000 | -4.161521000 |
| 6                | 2.941050000             | -4.006045000 | -2.674609000 |
| 1                | 2.990424000             | -4.839530000 | -1.983423000 |
| 7                | 1.362986000             | 0.601568000  | -3.566902000 |
| 1                | 1.724482000             | 0.761426000  | -4.488782000 |
| 7                | 1.523206000             | -3.554468000 | -0.017149000 |
| 1                | 1.909756000             | -4.479822000 | -0.025162000 |
| 6                | -0.170559000            | -4.674732000 | 4.790738000  |
| 1                | -0.423090000            | -5.092574000 | 5.756851000  |
| 6                | 0.570713000             | -5.441777000 | 3.859592000  |
| 1                | 0.884909000             | -6.446100000 | 4.113553000  |
| 6                | -0.569256000            | -3.399692000 | 4.467107000  |
| 1                | -1.135685000            | -2.829698000 | 5.194508000  |

**Table S8.** The optimized Cartesian coordinates of the tetraoxa[8]circulene **3** in the ground singlet state calculated at the B3LYP/DZP level of theory

| Atomic Number | Coordinates (Angstroms) |              |              |
|---------------|-------------------------|--------------|--------------|
|               | X                       | Y            | Z            |
| 6             | 0.054886000             | 8.723389000  | 9.763710000  |
| 6             | 0.472046000             | 7.517028000  | 9.202463000  |
| 6             | 0.914890000             | 7.514127000  | 7.878546000  |
| 6             | 0.922393000             | 8.718177000  | 7.174855000  |
| 6             | 0.505348000             | 9.923107000  | 7.737883000  |
| 6             | 0.062844000             | 9.925899000  | 9.057985000  |
| 8             | -0.413311000            | 8.914349000  | 11.053071000 |
| 6             | -0.703991000            | 10.264496000 | 11.154124000 |
| 6             | -0.427005000            | 10.920180000 | 9.955638000  |
| 8             | 1.326105000             | 8.902316000  | 5.863328000  |
| 6             | 1.158779000             | 10.252003000 | 5.602174000  |
| 6             | 0.659183000             | 10.913709000 | 6.722638000  |
| 6             | -1.203077000            | 10.924731000 | 12.276608000 |
| 6             | -1.435071000            | 12.298908000 | 12.195470000 |
| 6             | -1.158391000            | 12.952054000 | 10.994955000 |
| 6             | -0.658771000            | 12.290345000 | 9.874514000  |
| 6             | -0.505002000            | 13.280999000 | 8.859211000  |
| 6             | -0.922021000            | 14.485894000 | 9.422258000  |
| 8             | -1.325667000            | 14.301759000 | 10.733813000 |
| 6             | 1.435233000             | 10.905087000 | 4.401599000  |
| 6             | 1.202976000             | 12.279209000 | 4.320348000  |
| 6             | 0.703926000             | 12.939459000 | 5.442850000  |
| 6             | 0.427228000             | 12.283853000 | 6.641459000  |
| 6             | -0.062591000            | 13.278163000 | 7.539100000  |
| 6             | -0.054986000            | 14.480596000 | 6.833164000  |
| 8             | 0.413035000             | 14.289564000 | 5.543778000  |
| 6             | -0.472254000            | 15.686930000 | 7.394411000  |
| 6             | -0.914913000            | 15.689878000 | 8.718404000  |
| 1             | 0.452971000             | 6.602952000  | 9.778964000  |
| 1             | 1.244334000             | 6.597729000  | 7.409760000  |
| 1             | -1.407163000            | 10.385143000 | 13.190720000 |
| 1             | -1.820326000            | 12.844287000 | 13.045399000 |
| 1             | 1.820451000             | 10.359690000 | 3.551664000  |
| 1             | 1.406836000             | 12.818751000 | 3.406159000  |
| 1             | -0.453476000            | 16.600970000 | 6.817842000  |
| 1             | -1.244446000            | 16.606271000 | 9.187136000  |

**Table S9.** The optimized Cartesian coordinates of the tetraoxa[8]circulene **3** cation in the ground singlet state calculated at the B3LYP/DZP level of theory

| Atomic Number | Coordinates (Angstroms) |              |              |
|---------------|-------------------------|--------------|--------------|
|               | X                       | Y            | Z            |
| 6             | 0.051129000             | 8.720369000  | 9.772248000  |
| 6             | 0.468274000             | 7.525527000  | 9.207845000  |
| 6             | 0.915157000             | 7.522470000  | 7.872823000  |
| 6             | 0.926688000             | 8.715238000  | 7.166341000  |
| 6             | 0.508365000             | 9.930917000  | 7.729474000  |
| 6             | 0.058770000             | 9.933400000  | 9.065629000  |
| 8             | -0.414181000            | 8.913105000  | 11.053868000 |
| 6             | -0.703234000            | 10.255493000 | 11.156705000 |
| 6             | -0.423384000            | 10.911547000 | 9.947826000  |
| 8             | 1.326679000             | 8.901526000  | 5.862288000  |
| 6             | 1.161844000             | 10.242947000 | 5.600343000  |
| 6             | 0.659505000             | 10.905128000 | 6.731330000  |
| 6             | -1.199449000            | 10.918396000 | 12.267961000 |
| 6             | -1.432679000            | 12.304356000 | 12.186678000 |
| 6             | -1.160323000            | 12.961217000 | 10.996957000 |
| 6             | -0.658383000            | 12.299022000 | 9.865899000  |
| 6             | -0.507457000            | 13.273556000 | 8.867811000  |
| 6             | -0.926267000            | 14.488886000 | 9.430727000  |
| 8             | -1.325047000            | 14.302848000 | 10.735059000 |
| 6             | 1.433836000             | 10.899682000 | 4.410339000  |
| 6             | 1.199383000             | 12.284966000 | 4.328961000  |

|   |              |              |              |
|---|--------------|--------------|--------------|
| 6 | 0.703021000  | 12.948130000 | 5.440516000  |
| 6 | 0.424114000  | 12.292596000 | 6.649189000  |
| 6 | -0.058328000 | 13.271029000 | 7.531604000  |
| 6 | -0.051621000 | 14.483447000 | 6.824823000  |
| 8 | 0.411984000  | 14.290331000 | 5.542461000  |
| 6 | -0.469157000 | 15.678589000 | 7.389360000  |
| 6 | -0.915655000 | 15.681852000 | 8.723829000  |
| 1 | 0.452281000  | 6.606417000  | 9.777407000  |
| 1 | 1.243314000  | 6.601568000  | 7.410520000  |
| 1 | -1.406294000 | 10.386639000 | 13.186626000 |
| 1 | -1.817300000 | 12.843420000 | 13.041612000 |
| 1 | 1.818204000  | 10.360435000 | 3.555441000  |
| 1 | 1.404969000  | 12.817218000 | 3.410219000  |
| 1 | -0.453916000 | 16.597179000 | 6.818837000  |
| 1 | -1.243841000 | 16.602557000 | 9.186441000  |

**Table S10.** The optimized Cartesian coordinates of the tetraoxa[8]circulene **3** anion in the ground singlet state calculated at the B3LYP/DZP level of theory

| Atomic Number | Coordinates (Angstroms) |              |              |
|---------------|-------------------------|--------------|--------------|
|               | X                       | Y            | Z            |
| 6             | 0.055809000             | 8.710969000  | 9.766118000  |
| 6             | 0.469080000             | 7.512104000  | 9.214393000  |
| 6             | 0.918580000             | 7.509115000  | 7.867375000  |
| 6             | 0.924985000             | 8.705938000  | 7.173958000  |
| 6             | 0.507744000             | 9.926193000  | 7.732418000  |
| 6             | 0.060416000             | 9.928440000  | 9.063617000  |
| 8             | -0.414137000            | 8.905586000  | 11.062324000 |
| 6             | -0.707452000            | 10.262831000 | 11.165548000 |
| 6             | -0.425330000            | 10.913966000 | 9.952564000  |
| 8             | 1.331084000             | 8.893984000  | 5.855759000  |
| 6             | 1.163460000             | 10.250607000 | 5.590991000  |
| 6             | 0.659994000             | 10.907973000 | 6.726595000  |
| 6             | -1.202386000            | 10.912652000 | 12.281550000 |
| 6             | -1.438800000            | 12.310587000 | 12.198912000 |
| 6             | -1.163079000            | 12.953449000 | 11.006131000 |
| 6             | -0.659605000            | 12.296076000 | 9.870549000  |
| 6             | -0.507418000            | 13.277901000 | 8.864670000  |
| 6             | -0.924550000            | 14.498140000 | 9.423168000  |
| 8             | -1.330611000            | 14.310097000 | 10.741387000 |
| 6             | 1.438964000             | 10.893416000 | 4.398153000  |
| 6             | 1.202292000             | 12.291298000 | 4.315407000  |
| 6             | 0.707388000             | 12.941128000 | 5.431425000  |
| 6             | 0.425530000             | 12.290061000 | 6.644522000  |
| 6             | -0.060186000            | 13.275610000 | 7.533460000  |
| 6             | -0.055981000            | 14.493001000 | 6.830741000  |
| 8             | 0.413799000             | 14.298321000 | 5.534511000  |
| 6             | -0.469374000            | 15.691836000 | 7.382460000  |
| 6             | -0.918472000            | 15.694914000 | 8.729623000  |
| 1             | 0.449992000             | 6.598720000  | 9.792312000  |
| 1             | 1.248192000             | 6.593073000  | 7.397433000  |
| 1             | -1.405576000            | 10.372083000 | 13.195453000 |
| 1             | -1.823574000            | 12.857055000 | 13.048548000 |
| 1             | 1.823700000             | 10.346930000 | 3.548511000  |
| 1             | 1.405252000             | 12.831822000 | 3.401428000  |
| 1             | -0.450611000            | 16.605172000 | 6.804450000  |
| 1             | -1.248120000            | 16.610956000 | 9.199539000  |

**Table S11.** The optimized Cartesian coordinates of the octathia[8]circulene **4** in the ground singlet state calculated at the B3LYP/DZP level of theory

| Atomic Number | Coordinates (Angstroms) |              |              |
|---------------|-------------------------|--------------|--------------|
|               | X                       | Y            | Z            |
| 16            | -1.792714000            | -3.811760000 | 0.657599000  |
| 16            | -1.080076000            | -3.298719000 | -2.477701000 |
| 16            | 0.263282000             | -0.852701000 | -4.170702000 |

|    |              |              |              |
|----|--------------|--------------|--------------|
| 16 | 1.455004000  | 2.095563000  | -3.415933000 |
| 6  | -0.774639000 | -1.407940000 | 0.973054000  |
| 6  | -0.681741000 | -1.694998000 | -0.433158000 |
| 6  | -0.192152000 | -0.989544000 | -1.586292000 |
| 6  | 0.411032000  | 0.296375000  | -1.810572000 |
| 6  | -1.349964000 | -2.450725000 | 1.692686000  |
| 6  | -1.189147000 | -2.950279000 | -0.754204000 |
| 6  | -0.334904000 | -1.722563000 | -2.760547000 |
| 6  | 0.715277000  | 0.516355000  | -3.150377000 |
| 16 | 1.792714000  | 3.811760000  | -0.657599000 |
| 16 | 1.080076000  | 3.298719000  | 2.477701000  |
| 16 | -0.263282000 | 0.852701000  | 4.170702000  |
| 16 | -1.455004000 | -2.095563000 | 3.415933000  |
| 6  | 0.774639000  | 1.407940000  | -0.973054000 |
| 6  | 0.681741000  | 1.694998000  | 0.433158000  |
| 6  | 0.192152000  | 0.989544000  | 1.586292000  |
| 6  | -0.411032000 | -0.296375000 | 1.810572000  |
| 6  | 1.349964000  | 2.450725000  | -1.692686000 |
| 6  | 1.189147000  | 2.950279000  | 0.754204000  |
| 6  | 0.334904000  | 1.722563000  | 2.760547000  |
| 6  | -0.715277000 | -0.516355000 | 3.150377000  |

**Table S12.** The optimized Cartesian coordinates of the octathia[8]circulene 4 cation in the ground singlet state calculated at the B3LYP/DZP level of theory

| Atomic Number | Coordinates (Angstroms) |              |              |
|---------------|-------------------------|--------------|--------------|
|               | X                       | Y            | Z            |
| 16            | -1.791316000            | -3.793887000 | 0.670821000  |
| 16            | -1.073011000            | -3.272066000 | -2.443491000 |
| 16            | 0.269810000             | -0.830773000 | -4.126726000 |
| 16            | 1.448903000             | 2.097748000  | -3.393493000 |
| 6             | -0.760049000            | -1.383374000 | 0.954266000  |
| 6             | -0.671558000            | -1.664973000 | -0.419650000 |
| 6             | -0.188745000            | -0.970941000 | -1.553735000 |
| 6             | 0.404766000             | 0.295969000  | -1.773090000 |
| 6             | -1.335671000            | -2.431001000 | 1.678452000  |
| 6             | -1.177984000            | -2.916648000 | -0.742596000 |
| 6             | -0.328558000            | -1.695787000 | -2.715856000 |
| 6             | 0.706211000             | 0.512467000  | -3.107374000 |
| 16            | 1.791316000             | 3.793887000  | -0.670821000 |
| 16            | 1.073011000             | 3.272066000  | 2.443491000  |
| 16            | -0.269810000            | 0.830773000  | 4.126726000  |
| 16            | -1.448903000            | -2.097748000 | 3.393493000  |
| 6             | 0.760049000             | 1.383374000  | -0.954266000 |
| 6             | 0.671558000             | 1.664973000  | 0.419650000  |
| 6             | 0.188745000             | 0.970941000  | 1.553735000  |
| 6             | -0.404766000            | -0.295969000 | 1.773090000  |
| 6             | 1.335671000             | 2.431001000  | -1.678452000 |
| 6             | 1.177984000             | 2.916648000  | 0.742596000  |
| 6             | 0.328558000             | 1.695787000  | 2.715856000  |
| 6             | -0.706211000            | -0.512467000 | 3.107374000  |

**Table S13.** The optimized Cartesian coordinates of the octathia[8]circulene 4 anion in the ground singlet state calculated at the B3LYP/DZP level of theory

| Atomic Number | Coordinates (Angstroms) |              |              |
|---------------|-------------------------|--------------|--------------|
|               | X                       | Y            | Z            |
| 16            | -1.792714000            | -3.811760000 | 0.657599000  |
| 16            | -1.080076000            | -3.298719000 | -2.477701000 |
| 16            | 0.263282000             | -0.852701000 | -4.170702000 |
| 16            | 1.455004000             | 2.095563000  | -3.415933000 |
| 6             | -0.774639000            | -1.407940000 | 0.973054000  |
| 6             | -0.681741000            | -1.694998000 | -0.433158000 |
| 6             | -0.192152000            | -0.989544000 | -1.586292000 |

|    |              |              |              |
|----|--------------|--------------|--------------|
| 6  | 0.411032000  | 0.296375000  | -1.810572000 |
| 6  | -1.349964000 | -2.450725000 | 1.692686000  |
| 6  | -1.189147000 | -2.950279000 | -0.754204000 |
| 6  | -0.334904000 | -1.722563000 | -2.760547000 |
| 6  | 0.715277000  | 0.516355000  | -3.150377000 |
| 16 | 1.792714000  | 3.811760000  | -0.657599000 |
| 16 | 1.080076000  | 3.298719000  | 2.477701000  |
| 16 | -0.263282000 | 0.852701000  | 4.170702000  |
| 16 | -1.455004000 | -2.095563000 | 3.415933000  |
| 6  | 0.774639000  | 1.407940000  | -0.973054000 |
| 6  | 0.681741000  | 1.694998000  | 0.433158000  |
| 6  | 0.192152000  | 0.989544000  | 1.586292000  |
| 6  | -0.411032000 | -0.296375000 | 1.810572000  |
| 6  | 1.349964000  | 2.450725000  | -1.692686000 |
| 6  | 1.189147000  | 2.950279000  | 0.754204000  |
| 6  | 0.334904000  | 1.722563000  | 2.760547000  |
| 6  | -0.715277000 | -0.516355000 | 3.150377000  |

**Table S14.** The optimized Cartesian coordinates of the tetrathiatetraselena[8]circulene **5** in the ground singlet state calculated at the B3LYP/DZP level of theory

| Atomic Number | Coordinates (Angstroms) |              |              |
|---------------|-------------------------|--------------|--------------|
|               | X                       | Y            | Z            |
| 34            | 1.618380000             | 2.113438000  | -3.522440000 |
| 34            | -1.201420000            | -3.375557000 | -2.582044000 |
| 16            | 0.294621000             | -0.865427000 | -4.165198000 |
| 16            | 1.935819000             | 3.743818000  | -0.642081000 |
| 6             | -0.204965000            | -0.983790000 | -1.587612000 |
| 6             | 0.446793000             | 0.276864000  | -1.802732000 |
| 6             | -0.739831000            | -1.669547000 | -0.440528000 |
| 6             | 1.456268000             | 2.407838000  | -1.647120000 |
| 6             | 0.761074000             | 0.457551000  | -3.137435000 |
| 6             | 0.839484000             | 1.377246000  | -0.961848000 |
| 6             | -0.343153000            | -1.686141000 | -2.770580000 |
| 6             | -1.290524000            | -2.902444000 | -0.737355000 |
| 34            | -1.618380000            | -2.113438000 | 3.522440000  |
| 34            | 1.201420000             | 3.375557000  | 2.582044000  |
| 16            | -0.294621000            | 0.865427000  | 4.165198000  |
| 16            | -1.935819000            | -3.743818000 | 0.642081000  |
| 6             | 0.204965000             | 0.983790000  | 1.587612000  |
| 6             | -0.446793000            | -0.276864000 | 1.802732000  |
| 6             | 0.739831000             | 1.669547000  | 0.440528000  |
| 6             | -1.456268000            | -2.407838000 | 1.647120000  |
| 6             | -0.761074000            | -0.457551000 | 3.137435000  |
| 6             | -0.839484000            | -1.377246000 | 0.961848000  |
| 6             | 0.343153000             | 1.686141000  | 2.770580000  |
| 6             | 1.290524000             | 2.902444000  | 0.737355000  |

**Table S15.** The optimized Cartesian coordinates of the tetrathiatetraselena[8]circulene **5** cation in the ground singlet state calculated at the B3LYP/DZP level of theory

| Atomic Number | Coordinates (Angstroms) |              |              |
|---------------|-------------------------|--------------|--------------|
|               | X                       | Y            | Z            |
| 34            | -0.401703000            | 10.453954000 | -3.497244000 |
| 34            | -3.224846000            | 4.954081000  | -2.574824000 |
| 16            | -1.724152000            | 7.468143000  | -4.141652000 |
| 16            | -0.075155000            | 12.093054000 | -0.632079000 |
| 6             | -2.220415000            | 7.357459000  | -1.572428000 |
| 6             | -1.570993000            | 8.614855000  | -1.787184000 |
| 6             | -2.750003000            | 6.678814000  | -0.437733000 |
| 6             | -0.560274000            | 10.748278000 | -1.641275000 |
| 6             | -1.257245000            | 8.794623000  | -3.120240000 |
| 6             | -1.180490000            | 9.711931000  | -0.949359000 |
| 6             | -2.359376000            | 6.653538000  | -2.763839000 |
| 6             | -3.309003000            | 5.428496000  | -0.739390000 |

|    |              |              |             |
|----|--------------|--------------|-------------|
| 34 | -3.627253000 | 6.226025000  | 3.497250000 |
| 34 | -0.804225000 | 11.725956000 | 2.574815000 |
| 16 | -2.304830000 | 9.211844000  | 4.141655000 |
| 16 | -3.953864000 | 4.586956000  | 0.632072000 |
| 6  | -1.808596000 | 9.322549000  | 1.572428000 |
| 6  | -2.457974000 | 8.065130000  | 1.787185000 |
| 6  | -1.279025000 | 10.001211000 | 0.437737000 |
| 6  | -3.468701000 | 5.931705000  | 1.641280000 |
| 6  | -2.771712000 | 7.885356000  | 3.120242000 |
| 6  | -2.848470000 | 6.968043000  | 0.949361000 |
| 6  | -1.669655000 | 10.026478000 | 2.763837000 |
| 6  | -0.720043000 | 11.251535000 | 0.739382000 |

**Table S16.** The optimized Cartesian coordinates of the tetrathiatetraselena[8]circulene **5** anion in the ground singlet state calculated at the B3LYP/DZP level of theory

| Atomic Number | Coordinates (Angstroms) |              |              |
|---------------|-------------------------|--------------|--------------|
|               | X                       | Y            | Z            |
| 34            | -0.395514000            | 10.462633000 | -3.535080000 |
| 34            | -3.221530000            | 4.954525000  | -2.590933000 |
| 16            | -1.717287000            | 7.470033000  | -4.183619000 |
| 16            | -0.070232000            | 12.100354000 | -0.644990000 |
| 6             | -2.218622000            | 7.358238000  | -1.584179000 |
| 6             | -1.567324000            | 8.615585000  | -1.798842000 |
| 6             | -2.752292000            | 6.673766000  | -0.439352000 |
| 6             | -0.555295000            | 10.747945000 | -1.647776000 |
| 6             | -1.250897000            | 8.796733000  | -3.138946000 |
| 6             | -1.175928000            | 9.713929000  | -0.959705000 |
| 6             | -2.357379000            | 6.653110000  | -2.772033000 |
| 6             | -3.305582000            | 5.436067000  | -0.737742000 |
| 34            | -3.633553000            | 6.217398000  | 3.535070000  |
| 34            | -0.807704000            | 11.725592000 | 2.590895000  |
| 16            | -2.311803000            | 9.210007000  | 4.183604000  |
| 16            | -3.958869000            | 4.579696000  | 0.644968000  |
| 6             | -1.810295000            | 9.321725000  | 1.584194000  |
| 6             | -2.461527000            | 8.064341000  | 1.798864000  |
| 6             | -1.276649000            | 10.006217000 | 0.439370000  |
| 6             | -3.473617000            | 5.932008000  | 1.647792000  |
| 6             | -2.778032000            | 7.883232000  | 3.138954000  |
| 6             | -2.852908000            | 6.965984000  | 0.959730000  |
| 6             | -1.671663000            | 10.026912000 | 2.772028000  |
| 6             | -0.723502000            | 11.243984000 | 0.737727000  |

**Table S17.** The optimized Cartesian coordinates of the tetrathiatetrasilica[8]circulene **6** in the ground singlet state calculated at the B3LYP/DZP level of theory

| Atomic Number | Coordinates (Angstroms) |              |             |
|---------------|-------------------------|--------------|-------------|
|               | X                       | Y            | Z           |
| 6             | 9.980919000             | 16.820883000 | 5.599327000 |
| 6             | 10.165658000            | 12.889276000 | 2.798435000 |
| 6             | 11.076937000            | 13.458024000 | 1.765513000 |
| 6             | 11.804998000            | 15.991583000 | 2.344741000 |
| 6             | 11.737812000            | 14.714569000 | 1.580749000 |
| 6             | 12.657580000            | 9.503483000  | 2.149275000 |
| 1             | 12.228388000            | 9.665819000  | 3.139335000 |
| 16            | 12.670189000            | 18.404821000 | 2.639380000 |
| 1             | 13.244016000            | 8.583236000  | 2.186541000 |
| 1             | 13.344252000            | 10.328696000 | 1.953519000 |
| 6             | 15.265056000            | 16.226453000 | 0.185915000 |
| 1             | 15.541370000            | 15.676497000 | 1.091011000 |
| 1             | 15.672903000            | 17.236512000 | 0.311763000 |
| 6             | 12.626867000            | 16.950001000 | 1.746563000 |
| 6             | 9.589441000             | 13.372206000 | 4.016995000 |



|    |              |              |              |
|----|--------------|--------------|--------------|
| 6  | 9.772579000  | 11.577474000 | 2.523694000  |
| 6  | 12.792443000 | 17.309016000 | -1.369179000 |
| 1  | 13.121172000 | 16.765000000 | -2.262115000 |
| 1  | 13.326339000 | 18.266844000 | -1.395431000 |
| 6  | 9.639790000  | 14.656608000 | 4.770086000  |
| 6  | 11.566305000 | 9.417566000  | 1.074017000  |
| 1  | 12.017557000 | 9.222550000  | 0.093742000  |
| 1  | 10.913710000 | 8.557636000  | 1.269206000  |
| 6  | 8.494181000  | 12.066437000 | 7.738633000  |
| 1  | 9.586259000  | 11.993827000 | 7.734918000  |
| 1  | 8.124150000  | 11.039432000 | 7.634877000  |
| 6  | 6.105377000  | 13.182982000 | 6.079815000  |
| 1  | 5.761684000  | 13.741611000 | 6.958241000  |
| 1  | 5.668212000  | 12.181959000 | 6.178487000  |
| 6  | 8.008946000  | 12.659673000 | 9.070423000  |
| 1  | 6.919237000  | 12.704456000 | 9.120308000  |
| 1  | 8.348810000  | 12.056830000 | 9.915073000  |
| 1  | 8.390429000  | 13.672045000 | 9.221013000  |
| 6  | 8.200028000  | 11.851411000 | -0.637573000 |
| 1  | 8.751175000  | 12.737156000 | -0.957418000 |
| 1  | 7.459471000  | 11.623421000 | -1.406855000 |
| 1  | 7.662869000  | 12.115902000 | 0.274717000  |
| 16 | 8.734545000  | 10.954692000 | 3.728267000  |
| 16 | 12.401602000 | 13.252575000 | -0.438093000 |
| 16 | 8.936828000  | 16.134384000 | 6.763745000  |
| 14 | 10.863470000 | 18.457153000 | 5.405592000  |
| 14 | 13.384804000 | 16.356401000 | 0.147694000  |
| 14 | 10.463871000 | 10.935633000 | 0.910984000  |
| 14 | 7.981160000  | 13.019695000 | 6.195626000  |
| 6  | 8.869437000  | 14.642911000 | 5.935823000  |
| 6  | 8.783393000  | 12.406804000 | 4.625544000  |
| 6  | 10.288206000 | 15.918605000 | 4.577121000  |
| 6  | 15.896247000 | 15.562003000 | -1.047852000 |
| 1  | 15.673181000 | 16.113268000 | -1.963381000 |
| 1  | 16.983007000 | 15.513013000 | -0.953845000 |
| 1  | 15.536151000 | 14.539250000 | -1.180404000 |
| 6  | 9.745026000  | 19.948378000 | 5.128686000  |
| 1  | 9.074794000  | 19.707194000 | 4.297516000  |
| 1  | 10.372917000 | 20.775893000 | 4.776775000  |
| 6  | 9.142368000  | 10.661034000 | -0.406603000 |
| 1  | 8.563391000  | 9.773934000  | -0.123057000 |
| 1  | 9.646530000  | 10.394469000 | -1.343253000 |
| 6  | 13.083866000 | 17.615177000 | 7.052151000  |
| 1  | 13.661982000 | 17.352324000 | 6.164742000  |
| 1  | 13.788480000 | 17.869498000 | 7.846596000  |
| 1  | 12.540554000 | 16.720974000 | 7.361839000  |
| 6  | 12.124476000 | 18.780645000 | 6.770482000  |
| 1  | 11.579352000 | 19.043186000 | 7.684573000  |
| 1  | 12.692808000 | 19.678502000 | 6.498708000  |
| 6  | 11.277641000 | 17.549362000 | -1.432268000 |
| 1  | 10.930910000 | 18.125324000 | -0.572916000 |
| 1  | 11.004342000 | 18.098918000 | -2.335309000 |
| 1  | 10.726598000 | 16.607480000 | -1.435609000 |
| 6  | 5.591802000  | 13.857863000 | 4.799901000  |
| 1  | 5.883826000  | 13.297057000 | 3.910754000  |
| 1  | 4.502353000  | 13.932114000 | 4.805424000  |
| 1  | 5.994366000  | 14.866710000 | 4.693793000  |
| 6  | 11.612252000 | 17.790649000 | 3.830824000  |
| 6  | 11.216962000 | 16.479476000 | 3.555702000  |
| 6  | 11.358665000 | 12.566231000 | 0.727553000  |
| 6  | 12.498540000 | 14.732115000 | 0.408633000  |
| 6  | 8.928118000  | 20.400200000 | 6.348554000  |
| 1  | 9.570751000  | 20.696849000 | 7.179922000  |
| 1  | 8.298685000  | 21.257797000 | 6.102057000  |
| 1  | 8.268698000  | 19.605917000 | 6.705579000  |

**Table S18.** The optimized Cartesian coordinates of the tetrathiatetrasila[8]circulene **6** anion in the ground singlet state calculated at the B3LYP/DZP level of theory

| Atomic Number | Coordinates (Angstroms) |              |              |
|---------------|-------------------------|--------------|--------------|
|               | X                       | Y            | Z            |
| 6             | 9.989719000             | 16.825992000 | 5.600290000  |
| 6             | 10.169055000            | 12.896754000 | 2.801175000  |
| 6             | 11.078674000            | 13.463383000 | 1.771931000  |
| 6             | 11.813555000            | 15.981930000 | 2.357379000  |
| 6             | 11.741293000            | 14.710670000 | 1.591524000  |
| 6             | 12.631149000            | 9.445635000  | 2.106039000  |
| 1             | 12.206099000            | 9.608849000  | 3.098113000  |
| 16            | 12.693276000            | 18.409226000 | 2.648994000  |
| 1             | 13.206121000            | 8.515806000  | 2.134306000  |
| 1             | 13.326587000            | 10.265467000 | 1.916769000  |
| 6             | 15.284041000            | 16.235269000 | 0.155424000  |
| 1             | 15.581735000            | 15.681428000 | 1.051382000  |
| 1             | 15.688485000            | 17.247943000 | 0.277141000  |
| 6             | 12.647341000            | 16.939101000 | 1.752261000  |
| 6             | 9.598025000             | 13.375829000 | 4.014615000  |
| 6             | 9.771941000             | 11.578733000 | 2.512634000  |
| 6             | 12.851016000            | 17.324051000 | -1.370405000 |
| 1             | 13.182438000            | 16.777360000 | -2.261479000 |
| 1             | 13.402171000            | 18.273338000 | -1.382024000 |
| 6             | 9.649741000             | 14.656044000 | 4.767100000  |
| 6             | 11.532974000            | 9.395798000  | 1.036384000  |
| 1             | 11.976129000            | 9.208941000  | 0.050006000  |
| 1             | 10.864924000            | 8.545100000  | 1.223938000  |
| 6             | 8.468391000             | 12.056277000 | 7.750339000  |
| 1             | 9.559522000             | 11.969643000 | 7.758079000  |
| 1             | 8.084376000             | 11.033902000 | 7.644591000  |
| 6             | 6.100904000             | 13.156566000 | 6.132800000  |
| 1             | 5.773103000             | 13.719310000 | 7.015530000  |
| 1             | 5.678102000             | 12.150205000 | 6.248204000  |
| 6             | 7.981048000             | 12.657907000 | 9.077506000  |
| 1             | 6.890876000             | 12.718203000 | 9.116630000  |
| 1             | 8.304916000             | 12.058703000 | 9.933136000  |
| 1             | 8.372007000             | 13.668062000 | 9.221852000  |
| 6             | 8.191885000             | 11.789430000 | -0.684139000 |
| 1             | 8.736778000             | 12.678395000 | -1.006857000 |
| 1             | 7.457572000             | 11.545073000 | -1.456878000 |
| 1             | 7.648283000             | 12.059829000 | 0.223012000  |
| 16            | 8.721706000             | 10.946693000 | 3.724335000  |
| 16            | 12.404641000            | 13.249994000 | -0.451385000 |
| 16            | 8.933243000             | 16.138427000 | 6.775323000  |
| 14            | 10.864121000            | 18.444526000 | 5.398458000  |
| 14            | 13.388916000            | 16.345511000 | 0.167037000  |
| 14            | 10.456769000            | 10.952864000 | 0.912949000  |
| 14            | 7.995222000             | 13.023520000 | 6.187276000  |
| 6             | 8.870363000             | 14.634618000 | 5.937711000  |
| 6             | 8.781420000             | 12.410782000 | 4.631579000  |
| 6             | 10.295298000            | 15.911255000 | 4.575977000  |
| 6             | 15.894879000            | 15.579120000 | -1.092682000 |
| 1             | 15.648974000            | 16.133995000 | -2.001060000 |
| 1             | 16.985358000            | 15.528138000 | -1.027116000 |
| 1             | 15.528803000            | 14.557653000 | -1.222225000 |
| 6             | 9.759585000             | 19.966292000 | 5.140532000  |
| 1             | 9.087484000             | 19.737140000 | 4.307385000  |
| 1             | 10.395492000            | 20.791988000 | 4.796676000  |
| 6             | 9.150525000             | 10.618777000 | -0.425087000 |
| 1             | 8.582026000             | 9.727298000  | -0.131104000 |
| 1             | 9.669189000             | 10.346315000 | -1.353079000 |
| 6             | 13.079029000            | 17.705652000 | 7.106822000  |
| 1             | 13.671836000            | 17.438532000 | 6.230065000  |
| 1             | 13.768784000            | 17.984573000 | 7.908490000  |
| 1             | 12.546472000            | 16.805540000 | 7.419083000  |
| 6             | 12.098342000            | 18.842030000 | 6.786219000  |
| 1             | 11.532781000            | 19.109748000 | 7.687217000  |
| 1             | 12.650922000            | 19.747047000 | 6.502453000  |
| 6             | 11.342384000            | 17.592018000 | -1.455842000 |
| 1             | 10.995973000            | 18.165344000 | -0.594209000 |
| 1             | 11.084106000            | 18.151033000 | -2.359627000 |
| 1             | 10.778590000            | 16.657431000 | -1.466066000 |
| 6             | 5.548667000             | 13.816736000 | 4.862044000  |

|   |              |              |             |
|---|--------------|--------------|-------------|
| 1 | 5.834395000  | 13.254382000 | 3.971441000 |
| 1 | 4.457124000  | 13.881580000 | 4.885039000 |
| 1 | 5.943232000  | 14.827556000 | 4.742164000 |
| 6 | 11.619852000 | 17.788166000 | 3.844758000 |
| 6 | 11.225547000 | 16.468947000 | 3.559946000 |
| 6 | 11.350992000 | 12.561814000 | 0.726577000 |
| 6 | 12.507942000 | 14.737596000 | 0.412384000 |
| 6 | 8.943146000  | 20.414789000 | 6.361690000 |
| 1 | 9.588063000  | 20.699585000 | 7.196503000 |
| 1 | 8.313297000  | 21.277818000 | 6.127995000 |
| 1 | 8.284320000  | 19.616570000 | 6.712364000 |

**Table S19.** The optimized Cartesian coordinates of the tetrathiatetrasila[8]circulene **6** cation in the ground singlet state calculated at the B3LYP/DZP level of theory

| Atomic Number | Coordinates (Angstroms) |              |              |
|---------------|-------------------------|--------------|--------------|
|               | X                       | Y            | Z            |
| 6             | 9.985497000             | 16.834742000 | 5.602295000  |
| 6             | 10.173498000            | 12.900877000 | 2.789246000  |
| 6             | 11.063901000            | 13.458802000 | 1.777234000  |
| 6             | 11.790045000            | 15.987986000 | 2.348151000  |
| 6             | 11.726735000            | 14.714242000 | 1.589672000  |
| 6             | 12.668949000            | 9.506690000  | 2.145864000  |
| 1             | 12.243862000            | 9.665865000  | 3.138068000  |
| 16            | 12.643557000            | 18.408974000 | 2.652121000  |
| 1             | 13.255750000            | 8.588037000  | 2.181893000  |
| 1             | 13.356484000            | 10.329885000 | 1.945562000  |
| 6             | 15.256317000            | 16.218656000 | 0.213102000  |
| 1             | 15.521830000            | 15.675886000 | 1.125648000  |
| 1             | 15.664945000            | 17.228731000 | 0.335399000  |
| 6             | 12.603237000            | 16.944413000 | 1.749838000  |
| 6             | 9.595100000             | 13.380299000 | 4.008159000  |
| 6             | 9.778098000             | 11.567354000 | 2.512698000  |
| 6             | 12.769824000            | 17.298312000 | -1.367370000 |
| 1             | 13.098358000            | 16.751927000 | -2.258684000 |
| 1             | 13.302405000            | 18.256225000 | -1.403160000 |
| 6             | 9.642691000             | 14.660734000 | 4.756644000  |
| 6             | 11.577270000            | 9.407767000  | 1.071742000  |
| 1             | 12.026963000            | 9.208713000  | 0.091861000  |
| 1             | 10.930420000            | 8.544427000  | 1.269532000  |
| 6             | 8.518688000             | 12.078235000 | 7.734918000  |
| 1             | 9.611362000             | 12.016748000 | 7.729158000  |
| 1             | 8.159444000             | 11.047201000 | 7.633845000  |
| 6             | 6.111870000             | 13.188924000 | 6.055668000  |
| 1             | 5.761629000             | 13.749117000 | 6.930252000  |
| 1             | 5.671622000             | 12.189865000 | 6.157008000  |
| 6             | 8.026863000             | 12.667423000 | 9.067237000  |
| 1             | 6.937518000             | 12.697862000 | 9.120268000  |
| 1             | 8.376492000             | 12.064281000 | 9.906241000  |
| 1             | 8.398813000             | 13.682292000 | 9.223170000  |
| 6             | 8.192704000             | 11.864868000 | -0.631610000 |
| 1             | 8.743887000             | 12.749618000 | -0.954015000 |
| 1             | 7.450272000             | 11.641523000 | -1.398790000 |
| 1             | 7.655458000             | 12.126562000 | 0.281379000  |
| 16            | 8.757663000             | 10.952299000 | 3.713877000  |
| 16            | 12.388656000            | 13.237378000 | -0.424733000 |
| 16            | 8.945846000             | 16.151173000 | 6.748928000  |
| 14            | 10.862023000            | 18.494195000 | 5.426829000  |
| 14            | 13.385247000            | 16.361423000 | 0.140347000  |
| 14            | 10.459762000            | 10.900905000 | 0.887343000  |
| 14            | 7.977182000             | 13.016253000 | 6.201443000  |
| 6             | 8.875115000             | 14.647333000 | 5.916533000  |
| 6             | 8.797300000             | 12.417130000 | 4.616467000  |
| 6             | 10.295039000            | 15.920593000 | 4.562372000  |
| 6             | 15.900807000            | 15.545171000 | -1.010355000 |
| 1             | 15.692815000            | 16.091205000 | -1.931726000 |
| 1             | 16.984746000            | 15.499455000 | -0.896852000 |
| 1             | 15.547176000            | 14.520209000 | -1.141520000 |
| 6             | 9.729271000             | 19.961468000 | 5.138925000  |
| 1             | 9.056178000             | 19.714658000 | 4.311895000  |
| 1             | 10.352267000            | 20.789753000 | 4.780526000  |

|   |              |              |              |
|---|--------------|--------------|--------------|
| 6 | 9.127079000  | 10.665510000 | -0.414819000 |
| 1 | 8.544782000  | 9.779506000  | -0.135916000 |
| 1 | 9.623465000  | 10.399849000 | -1.355475000 |
| 6 | 13.092503000 | 17.597845000 | 7.033244000  |
| 1 | 13.668009000 | 17.342106000 | 6.142145000  |
| 1 | 13.801557000 | 17.843548000 | 7.824807000  |
| 1 | 12.549846000 | 16.703189000 | 7.342608000  |
| 6 | 12.139493000 | 18.774043000 | 6.774108000  |
| 1 | 11.604658000 | 19.032008000 | 7.695183000  |
| 1 | 12.710240000 | 19.671926000 | 6.508966000  |
| 6 | 11.254007000 | 17.534284000 | -1.425824000 |
| 1 | 10.905741000 | 18.118312000 | -0.572550000 |
| 1 | 10.982305000 | 18.078094000 | -2.331517000 |
| 1 | 10.701510000 | 16.593292000 | -1.427018000 |
| 6 | 5.609441000  | 13.859889000 | 4.769108000  |
| 1 | 5.900125000  | 13.294607000 | 3.882348000  |
| 1 | 4.521028000  | 13.933730000 | 4.771795000  |
| 1 | 6.009117000  | 14.869529000 | 4.659796000  |
| 6 | 11.598745000 | 17.804462000 | 3.837469000  |
| 6 | 11.200609000 | 16.472074000 | 3.560223000  |
| 6 | 11.350953000 | 12.553604000 | 0.723555000  |
| 6 | 12.486578000 | 14.730315000 | 0.424691000  |
| 6 | 8.919008000  | 20.416701000 | 6.363368000  |
| 1 | 9.564585000  | 20.721590000 | 7.188418000  |
| 1 | 8.290876000  | 21.271493000 | 6.109126000  |
| 1 | 8.258346000  | 19.627379000 | 6.727931000  |

**Table S20.** The optimized Cartesian coordinates of the tetragermatetraphia[8]circulene **7** in the ground singlet state calculated at the B3LYP/DZP level of theory

| Atomic<br>Number | Coordinates (Angstroms) |              |              |
|------------------|-------------------------|--------------|--------------|
|                  | X                       | Y            | Z            |
| 6                | 11.901086000            | 15.154571000 | 19.996011000 |
| 6                | 11.342601000            | 14.687291000 | 18.752023000 |
| 6                | 10.328457000            | 15.212545000 | 17.788329000 |
| 6                | 9.601129000             | 16.448478000 | 17.655764000 |
| 6                | 9.503846000             | 17.708235000 | 18.454862000 |
| 6                | 9.997791000             | 18.138590000 | 19.738238000 |
| 6                | 10.866666000            | 17.532524000 | 20.791830000 |
| 6                | 11.663342000            | 16.335699000 | 20.882478000 |
| 6                | 12.837451000            | 14.251120000 | 20.498693000 |
| 6                | 11.875521000            | 13.450982000 | 18.387848000 |
| 6                | 10.042706000            | 14.340592000 | 16.737246000 |
| 6                | 8.817203000             | 16.451827000 | 16.502091000 |
| 6                | 8.704980000             | 18.689113000 | 17.866897000 |
| 6                | 9.533472000             | 19.414051000 | 20.057802000 |
| 6                | 10.997795000            | 18.318814000 | 21.937402000 |
| 6                | 12.372022000            | 16.291131000 | 22.083247000 |
| 6                | 13.071543000            | 13.519285000 | 23.698608000 |
| 1                | 13.692766000            | 12.624956000 | 23.595945000 |
| 1                | 13.369255000            | 13.998394000 | 24.635313000 |
| 6                | 11.587097000            | 13.151476000 | 23.731857000 |
| 1                | 10.959059000            | 14.037304000 | 23.839553000 |
| 1                | 11.369403000            | 12.484559000 | 24.569600000 |
| 1                | 11.280512000            | 12.644960000 | 22.815562000 |
| 6                | 15.473621000            | 15.220935000 | 22.239843000 |
| 1                | 16.035900000            | 14.302464000 | 22.050731000 |
| 1                | 15.641976000            | 15.879254000 | 21.385110000 |
| 6                | 15.944837000            | 15.883137000 | 23.537530000 |
| 1                | 15.409646000            | 16.815471000 | 23.730266000 |
| 1                | 17.009193000            | 16.125286000 | 23.488441000 |
| 1                | 15.800266000            | 15.231973000 | 24.402058000 |
| 6                | 9.957611000             | 11.083446000 | 17.228881000 |
| 1                | 9.390274000             | 10.820730000 | 16.331785000 |
| 1                | 10.653590000            | 10.259014000 | 17.409267000 |
| 6                | 9.026001000             | 11.278108000 | 18.426300000 |
| 1                | 9.584574000             | 11.531730000 | 19.328643000 |
| 1                | 8.457849000             | 10.367602000 | 18.631410000 |
| 1                | 8.311655000             | 12.083615000 | 18.249567000 |
| 6                | 12.266083000            | 12.361035000 | 15.285052000 |
| 1                | 12.868844000            | 11.485092000 | 15.541941000 |

|    |              |              |              |
|----|--------------|--------------|--------------|
| 1  | 11.653375000 | 12.073158000 | 14.426237000 |
| 6  | 13.160553000 | 13.552864000 | 14.943917000 |
| 1  | 12.571291000 | 14.425851000 | 14.659304000 |
| 1  | 13.826437000 | 13.314336000 | 14.111212000 |
| 1  | 13.780764000 | 13.841790000 | 15.794006000 |
| 6  | 5.919856000  | 17.973600000 | 16.283162000 |
| 1  | 5.499641000  | 18.976619000 | 16.167005000 |
| 1  | 5.603133000  | 17.399610000 | 15.408081000 |
| 6  | 5.415860000  | 17.316659000 | 17.569437000 |
| 1  | 5.820001000  | 16.309819000 | 17.687422000 |
| 1  | 4.325972000  | 17.240027000 | 17.567116000 |
| 1  | 5.707836000  | 17.888985000 | 18.451112000 |
| 6  | 8.501567000  | 19.106500000 | 14.592666000 |
| 1  | 8.139793000  | 20.134766000 | 14.676424000 |
| 1  | 9.591404000  | 19.146754000 | 14.645641000 |
| 6  | 8.043275000  | 18.480975000 | 13.272424000 |
| 1  | 8.419780000  | 17.462032000 | 13.159195000 |
| 1  | 8.408135000  | 19.057247000 | 12.419073000 |
| 1  | 6.954698000  | 18.443136000 | 13.196708000 |
| 6  | 8.522341000  | 20.226982000 | 23.057658000 |
| 1  | 7.877731000  | 21.002679000 | 22.634804000 |
| 1  | 7.959720000  | 19.292164000 | 23.018167000 |
| 6  | 8.904206000  | 20.574232000 | 24.498393000 |
| 1  | 9.532769000  | 19.801387000 | 24.945936000 |
| 1  | 8.014633000  | 20.671169000 | 25.125271000 |
| 1  | 9.447544000  | 21.519358000 | 24.557561000 |
| 6  | 11.251645000 | 21.591846000 | 21.829766000 |
| 1  | 10.630213000 | 22.467444000 | 21.620356000 |
| 1  | 11.637288000 | 21.718569000 | 22.844756000 |
| 6  | 12.399012000 | 21.486882000 | 20.823781000 |
| 1  | 13.042778000 | 20.633261000 | 21.041959000 |
| 1  | 13.019731000 | 22.385634000 | 20.844699000 |
| 1  | 12.027065000 | 21.361601000 | 19.805781000 |
| 16 | 13.025186000 | 12.876260000 | 19.507673000 |
| 16 | 8.940463000  | 15.001110000 | 15.617106000 |
| 16 | 8.542327000  | 20.077872000 | 18.841762000 |
| 16 | 12.066649000 | 17.639849000 | 23.079276000 |
| 32 | 13.556041000 | 14.753994000 | 22.234347000 |
| 32 | 11.047418000 | 12.675186000 | 16.802439000 |
| 32 | 7.886502000  | 18.132053000 | 16.194155000 |
| 32 | 10.055361000 | 20.020695000 | 21.831597000 |

**Table S21.** The optimized Cartesian coordinates of the tetragematetathia[8]circulene 7 cation in the ground singlet state calculated at the B3LYP/DZP level of theory

| Atomic<br>Number | Coordinates (Angstroms) |             |              |
|------------------|-------------------------|-------------|--------------|
|                  | X                       | Y           | Z            |
| 6                | 1.309322000             | 3.909048000 | 0.608261000  |
| 6                | 0.749374000             | 3.437741000 | -0.626426000 |
| 6                | -0.245614000            | 3.969894000 | -1.598242000 |
| 6                | -0.962780000            | 5.204775000 | -1.732888000 |
| 6                | -1.076923000            | 6.433692000 | -0.937434000 |
| 6                | -0.582448000            | 6.867855000 | 0.337790000  |
| 6                | 0.302208000             | 6.275569000 | 1.378609000  |
| 6                | 1.096144000             | 5.084094000 | 1.466503000  |
| 6                | 2.247771000             | 2.987191000 | 1.126743000  |
| 6                | 1.262780000             | 2.192088000 | -0.978409000 |
| 6                | -0.521742000            | 3.101837000 | -2.652015000 |
| 6                | -1.743113000            | 5.216339000 | -2.913456000 |
| 6                | -1.902956000            | 7.420474000 | -1.527516000 |
| 6                | -1.058542000            | 8.134750000 | 0.664338000  |
| 6                | 0.445649000             | 7.071230000 | 2.513722000  |
| 6                | 1.830437000             | 5.048128000 | 2.674182000  |
| 6                | 2.501330000             | 2.299356000 | 4.330924000  |
| 1                | 3.113279000             | 1.397753000 | 4.243861000  |
| 1                | 2.806964000             | 2.791621000 | 5.257626000  |
| 6                | 1.012681000             | 1.951285000 | 4.367784000  |
| 1                | 0.391823000             | 2.842823000 | 4.468408000  |
| 1                | 0.794484000             | 1.300253000 | 5.216341000  |
| 1                | 0.697396000             | 1.429348000 | 3.463329000  |
| 6                | 4.928780000             | 3.967238000 | 2.788877000  |

|    |              |              |              |
|----|--------------|--------------|--------------|
| 1  | 5.478593000  | 3.046935000  | 2.576146000  |
| 1  | 5.068281000  | 4.628519000  | 1.931497000  |
| 6  | 5.442927000  | 4.618550000  | 4.075708000  |
| 1  | 4.921015000  | 5.551960000  | 4.295880000  |
| 1  | 6.504093000  | 4.856992000  | 3.984210000  |
| 1  | 5.332179000  | 3.960035000  | 4.938739000  |
| 6  | -0.690084000 | -0.143422000 | -2.146643000 |
| 1  | -1.244203000 | -0.404329000 | -3.051884000 |
| 1  | -0.021092000 | -0.983647000 | -1.941618000 |
| 6  | -1.639798000 | 0.097027000  | -0.972187000 |
| 1  | -1.096968000 | 0.346231000  | -0.059178000 |
| 1  | -2.232340000 | -0.797197000 | -0.770047000 |
| 1  | -2.334079000 | 0.913661000  | -1.175523000 |
| 6  | 1.701638000  | 1.105953000  | -4.075263000 |
| 1  | 2.298004000  | 0.227792000  | -3.813245000 |
| 1  | 1.102370000  | 0.821056000  | -4.943885000 |
| 6  | 2.600290000  | 2.300388000  | -4.394945000 |
| 1  | 2.018951000  | 3.174931000  | -4.690477000 |
| 1  | 3.275640000  | 2.059789000  | -5.217953000 |
| 1  | 3.212544000  | 2.585412000  | -3.538020000 |
| 6  | -4.663135000 | 6.689300000  | -3.144463000 |
| 1  | -5.095622000 | 7.687654000  | -3.250669000 |
| 1  | -4.964206000 | 6.125810000  | -4.031239000 |
| 6  | -5.164386000 | 6.006954000  | -1.871054000 |
| 1  | -4.755313000 | 5.001069000  | -1.764004000 |
| 1  | -6.252235000 | 5.919970000  | -1.888540000 |
| 1  | -4.893255000 | 6.570536000  | -0.977354000 |
| 6  | -2.044890000 | 7.893063000  | -4.796801000 |
| 1  | -2.406555000 | 8.919283000  | -4.694142000 |
| 1  | -0.956466000 | 7.928326000  | -4.722431000 |
| 6  | -2.486540000 | 7.297128000  | -6.136479000 |
| 1  | -2.111198000 | 6.280899000  | -6.272208000 |
| 1  | -2.102829000 | 7.895325000  | -6.964691000 |
| 1  | -3.573029000 | 7.269589000  | -6.232797000 |
| 6  | -2.068710000 | 8.900150000  | 3.669910000  |
| 1  | -2.745255000 | 9.646187000  | 3.244158000  |
| 1  | -2.588330000 | 7.940889000  | 3.628030000  |
| 6  | -1.705038000 | 9.266083000  | 5.110550000  |
| 1  | -1.047132000 | 8.523377000  | 5.565845000  |
| 1  | -2.603886000 | 9.321596000  | 5.727228000  |
| 1  | -1.209063000 | 10.236000000 | 5.172078000  |
| 6  | 0.641129000  | 10.353037000 | 2.401938000  |
| 1  | -0.001314000 | 11.214570000 | 2.200043000  |
| 1  | 1.037328000  | 10.492692000 | 3.410681000  |
| 6  | 1.773183000  | 10.263618000 | 1.377953000  |
| 1  | 2.439354000  | 9.424901000  | 1.585869000  |
| 1  | 2.374907000  | 11.173997000 | 1.392968000  |
| 1  | 1.391044000  | 10.136781000 | 0.364007000  |
| 16 | 2.419444000  | 1.612628000  | 0.149571000  |
| 16 | -1.620519000 | 3.772228000  | -3.789440000 |
| 16 | -2.065879000 | 8.798835000  | -0.556308000 |
| 16 | 1.529817000  | 6.393377000  | 3.659931000  |
| 32 | 3.018875000  | 3.497190000  | 2.856142000  |
| 32 | 0.454520000  | 1.398813000  | -2.584525000 |
| 32 | -2.707133000 | 6.893930000  | -3.236684000 |
| 32 | -0.532333000 | 8.773193000  | 2.444702000  |

**Table S22.** The optimized Cartesian coordinates of the tetragermatetraphia[8]circulene **7** anion in the ground singlet state calculated at the B3LYP/DZP level of theory

| Atomic Number | Coordinates (Angstroms) |             |              |
|---------------|-------------------------|-------------|--------------|
|               | X                       | Y           | Z            |
| 6             | 2.222603000             | 4.803956000 | 13.807099000 |
| 6             | 2.786985000             | 4.335361000 | 15.039202000 |
| 6             | 3.775683000             | 4.871611000 | 16.017913000 |
| 6             | 4.509130000             | 6.095774000 | 16.146812000 |
| 6             | 4.622454000             | 7.345962000 | 15.341438000 |
| 6             | 4.104308000             | 7.788963000 | 14.079428000 |
| 6             | 3.195580000             | 7.208365000 | 13.049139000 |
| 6             | 2.415485000             | 6.009902000 | 12.950253000 |
| 6             | 1.304974000             | 3.881478000 | 13.278457000 |

|    |              |              |              |
|----|--------------|--------------|--------------|
| 6  | 2.282977000  | 3.072341000  | 15.389896000 |
| 6  | 4.040504000  | 3.996886000  | 17.085446000 |
| 6  | 5.294412000  | 6.106259000  | 17.310915000 |
| 6  | 5.458869000  | 8.313121000  | 15.921671000 |
| 6  | 4.580022000  | 9.067175000  | 13.748062000 |
| 6  | 3.022204000  | 8.031986000  | 11.923669000 |
| 6  | 1.668867000  | 5.977872000  | 11.761168000 |
| 6  | 1.087993000  | 3.228086000  | 10.048793000 |
| 1  | 0.491308000  | 2.312545000  | 10.112162000 |
| 1  | 0.788658000  | 3.734855000  | 9.126342000  |
| 6  | 2.582431000  | 2.902477000  | 10.019603000 |
| 1  | 3.181863000  | 3.812523000  | 9.956406000  |
| 1  | 2.838019000  | 2.271176000  | 9.163119000  |
| 1  | 2.890692000  | 2.379272000  | 10.926364000 |
| 6  | -1.385966000 | 4.709701000  | 11.514051000 |
| 1  | -1.878522000 | 3.742669000  | 11.655650000 |
| 1  | -1.634316000 | 5.325160000  | 12.381238000 |
| 6  | -1.870927000 | 5.373927000  | 10.222228000 |
| 1  | -1.408177000 | 6.353842000  | 10.082513000 |
| 1  | -2.954805000 | 5.523901000  | 10.229723000 |
| 1  | -1.633131000 | 4.770150000  | 9.343150000  |
| 6  | 4.102183000  | 0.688118000  | 16.777371000 |
| 1  | 4.587647000  | 0.468446000  | 17.733718000 |
| 1  | 3.392541000  | -0.125208000 | 16.594363000 |
| 6  | 5.133631000  | 0.767714000  | 15.651324000 |
| 1  | 4.656233000  | 0.980865000  | 14.693078000 |
| 1  | 5.687446000  | -0.170583000 | 15.549815000 |
| 1  | 5.855834000  | 1.565500000  | 15.833327000 |
| 6  | 1.747164000  | 2.043976000  | 18.489397000 |
| 1  | 1.156106000  | 1.162397000  | 18.220986000 |
| 1  | 2.319745000  | 1.775347000  | 19.382605000 |
| 6  | 0.836944000  | 3.241338000  | 18.765483000 |
| 1  | 1.417388000  | 4.118838000  | 19.055834000 |
| 1  | 0.125876000  | 3.027272000  | 19.569059000 |
| 1  | 0.266221000  | 3.515269000  | 17.876259000 |
| 6  | 8.240029000  | 7.579408000  | 17.560878000 |
| 1  | 8.665735000  | 8.581298000  | 17.676750000 |
| 1  | 8.530046000  | 7.010689000  | 18.449496000 |
| 6  | 8.772409000  | 6.904960000  | 16.295601000 |
| 1  | 8.357959000  | 5.901577000  | 16.180983000 |
| 1  | 9.862883000  | 6.817640000  | 16.317774000 |
| 1  | 8.497805000  | 7.468155000  | 15.402157000 |
| 6  | 5.723265000  | 8.787369000  | 19.193118000 |
| 1  | 6.125306000  | 9.799684000  | 19.088945000 |
| 1  | 4.634859000  | 8.870614000  | 19.160083000 |
| 6  | 6.176671000  | 8.164023000  | 20.516735000 |
| 1  | 5.766776000  | 7.159077000  | 20.642769000 |
| 1  | 5.847709000  | 8.758602000  | 21.374350000 |
| 1  | 7.264876000  | 8.085121000  | 20.574996000 |
| 6  | 5.467052000  | 9.940777000  | 10.713358000 |
| 1  | 6.125103000  | 10.720468000 | 11.109722000 |
| 1  | 6.039027000  | 9.010576000  | 10.719336000 |
| 6  | 5.017464000  | 10.292607000 | 9.293234000  |
| 1  | 4.376315000  | 9.513422000  | 8.874300000  |
| 1  | 5.871842000  | 10.407438000 | 8.619060000  |
| 1  | 4.456257000  | 11.229700000 | 9.267594000  |
| 6  | 2.879271000  | 11.344584000 | 12.060891000 |
| 1  | 3.557313000  | 12.186946000 | 12.233207000 |
| 1  | 2.448914000  | 11.486873000 | 11.065282000 |
| 6  | 1.780390000  | 11.307313000 | 13.123789000 |
| 1  | 1.089562000  | 10.480944000 | 12.946988000 |
| 1  | 1.200201000  | 12.234758000 | 13.131541000 |
| 1  | 2.200639000  | 11.164737000 | 14.120934000 |
| 16 | 1.141266000  | 2.473320000  | 14.252235000 |
| 16 | 5.152898000  | 4.654229000  | 18.220569000 |
| 16 | 5.621469000  | 9.720709000  | 14.948271000 |
| 16 | 1.926568000  | 7.364300000  | 10.778190000 |
| 32 | 0.574637000  | 4.399961000  | 11.573182000 |
| 32 | 3.038121000  | 2.351728000  | 17.011085000 |
| 32 | 6.259150000  | 7.752876000  | 17.583106000 |
| 32 | 3.991461000  | 9.697280000  | 12.023572000 |

---

**Table S23.** The optimized Cartesian coordinates of the tetrathia[8]circulene **8** in the ground singlet state calculated at the B3LYP/DZP level of theory

| Atomic<br>Number | X            | Coordinates (Angstroms)<br>Y | Z            |
|------------------|--------------|------------------------------|--------------|
| 16               | 12.253500000 | 13.801000000                 | 9.153200000  |
| 16               | 12.604700000 | 7.680300000                  | 9.040800000  |
| 16               | 15.432600000 | 7.785200000                  | 14.479500000 |
| 16               | 15.849900000 | 13.882200000                 | 14.112700000 |
| 8                | 11.053300000 | 12.146900000                 | 7.149100000  |
| 8                | 11.301700000 | 9.270500000                  | 7.038900000  |
| 8                | 13.351800000 | 5.344600000                  | 10.527000000 |
| 8                | 14.599600000 | 5.397000000                  | 13.131800000 |
| 8                | 16.698600000 | 9.375400000                  | 16.389300000 |
| 8                | 17.142100000 | 12.277300000                 | 16.148700000 |
| 8                | 14.946900000 | 16.222000000                 | 12.730500000 |
| 8                | 13.175900000 | 16.184100000                 | 10.444300000 |
| 6                | 13.085300000 | 11.478200000                 | 10.204600000 |
| 6                | 12.349300000 | 12.073100000                 | 9.145300000  |
| 6                | 11.736700000 | 11.406600000                 | 8.082800000  |
| 6                | 11.836800000 | 10.041400000                 | 8.041700000  |
| 6                | 12.533800000 | 9.409500000                  | 9.073800000  |
| 6                | 13.158800000 | 10.042300000                 | 10.182400000 |
| 6                | 13.698100000 | 9.016200000                  | 11.092700000 |
| 6                | 13.415200000 | 7.726000000                  | 10.569700000 |
| 6                | 13.690800000 | 6.502100000                  | 11.184000000 |
| 6                | 14.299300000 | 6.526800000                  | 12.410000000 |
| 6                | 14.616000000 | 7.772900000                  | 12.955600000 |
| 6                | 14.373100000 | 9.040700000                  | 12.362600000 |
| 6                | 14.946600000 | 10.096300000                 | 13.216300000 |
| 6                | 15.555700000 | 9.507300000                  | 14.353200000 |
| 6                | 16.285400000 | 10.163000000                 | 15.355300000 |
| 6                | 16.464700000 | 11.517400000                 | 15.218500000 |
| 6                | 15.817300000 | 12.149500000                 | 14.147500000 |
| 6                | 15.048000000 | 11.528100000                 | 13.128600000 |
| 6                | 14.474300000 | 12.554700000                 | 12.239800000 |
| 6                | 14.853800000 | 13.842900000                 | 12.700300000 |
| 6                | 14.479700000 | 15.069000000                 | 12.148300000 |
| 6                | 13.630000000 | 15.051400000                 | 11.074200000 |
| 6                | 13.255700000 | 13.807200000                 | 10.563800000 |
| 6                | 13.641200000 | 12.535200000                 | 11.068300000 |
| 6                | 9.859300000  | 9.244600000                  | 7.026400000  |
| 1                | 9.579400000  | 8.577800000                  | 6.215700000  |
| 1                | 9.456000000  | 10.240900000                 | 6.851400000  |
| 1                | 9.484100000  | 8.854000000                  | 7.973500000  |
| 6                | 12.278600000 | 4.610000000                  | 11.152600000 |
| 1                | 12.077300000 | 3.763700000                  | 10.501900000 |
| 1                | 11.390200000 | 5.238500000                  | 11.228600000 |
| 1                | 12.572600000 | 4.264300000                  | 12.142500000 |
| 6                | 15.664400000 | 4.606300000                  | 12.563900000 |
| 1                | 15.831600000 | 3.787900000                  | 13.258500000 |
| 1                | 16.570600000 | 5.207100000                  | 12.475000000 |
| 1                | 15.379400000 | 4.219400000                  | 11.586400000 |
| 6                | 18.012200000 | 9.563700000                  | 16.932500000 |
| 1                | 18.182900000 | 8.707500000                  | 17.579700000 |
| 1                | 18.070000000 | 10.481700000                 | 17.510500000 |
| 1                | 18.755700000 | 9.565900000                  | 16.134300000 |
| 6                | 18.460300000 | 12.701100000                 | 15.750600000 |
| 1                | 18.778500000 | 13.428400000                 | 16.492700000 |
| 1                | 18.447600000 | 13.166300000                 | 14.765500000 |
| 1                | 19.151400000 | 11.857100000                 | 15.741500000 |
| 6                | 15.859300000 | 16.966000000                 | 11.897500000 |
| 1                | 16.182300000 | 17.816600000                 | 12.491200000 |
| 1                | 15.364300000 | 17.306700000                 | 10.989100000 |
| 1                | 16.719400000 | 16.346700000                 | 11.638600000 |
| 6                | 12.270600000 | 16.974000000                 | 11.242500000 |
| 1                | 11.961300000 | 17.803000000                 | 10.612100000 |
| 1                | 12.767800000 | 17.345900000                 | 12.137300000 |
| 1                | 11.401600000 | 16.377400000                 | 11.523000000 |
| 6                | 11.698400000 | 12.198000000                 | 5.859800000  |
| 1                | 11.084000000 | 12.848200000                 | 5.243500000  |
| 1                | 11.756800000 | 11.204100000                 | 5.417900000  |
| 1                | 12.699500000 | 12.619600000                 | 5.958900000  |



**Table S24.** The optimized Cartesian coordinates of the tetrathia[8]circulene **8** cation in the ground singlet state calculated at the B3LYP/DZP level of theory

| Atomic<br>Number | Coordinates (Angstroms) |              |              |
|------------------|-------------------------|--------------|--------------|
|                  | X                       | Y            | Z            |
| 16               | 12.213950000            | 13.775195000 | 9.180550000  |
| 16               | 12.543873000            | 7.676624000  | 9.064035000  |
| 16               | 15.744569000            | 7.783327000  | 14.275371000 |
| 16               | 15.913862000            | 13.902237000 | 14.076226000 |
| 8                | 10.951650000            | 12.157146000 | 7.225856000  |
| 8                | 11.148267000            | 9.243046000  | 7.150322000  |
| 8                | 13.390198000            | 5.353428000  | 10.476518000 |
| 8                | 14.890651000            | 5.403671000  | 12.981266000 |
| 8                | 17.090803000            | 9.400003000  | 16.121183000 |
| 8                | 17.326822000            | 12.321589000 | 15.980451000 |
| 8                | 14.965480000            | 16.207485000 | 12.713809000 |
| 8                | 13.112341000            | 16.128620000 | 10.469447000 |
| 6                | 13.090373000            | 11.464748000 | 10.202674000 |
| 6                | 12.315243000            | 12.062250000 | 9.160969000  |
| 6                | 11.650403000            | 11.398883000 | 8.120399000  |
| 6                | 11.728280000            | 10.032850000 | 8.093860000  |
| 6                | 12.480996000            | 9.401712000  | 9.101955000  |
| 6                | 13.162880000            | 10.030551000 | 10.174144000 |
| 6                | 13.757204000            | 9.010974000  | 11.043942000 |
| 6                | 13.454862000            | 7.722441000  | 10.537094000 |
| 6                | 13.785058000            | 6.490621000  | 11.117749000 |
| 6                | 14.501607000            | 6.511378000  | 12.286414000 |
| 6                | 14.831034000            | 7.766061000  | 12.815602000 |
| 6                | 14.512735000            | 9.037298000  | 12.265060000 |
| 6                | 15.095524000            | 10.088012000 | 13.104435000 |
| 6                | 15.789257000            | 9.499321000  | 14.188020000 |
| 6                | 16.517233000            | 10.173681000 | 15.196541000 |
| 6                | 16.601443000            | 11.555254000 | 15.109443000 |
| 6                | 15.886892000            | 12.175290000 | 14.098785000 |
| 6                | 15.106557000            | 11.532856000 | 13.063559000 |
| 6                | 14.506001000            | 12.535971000 | 12.218654000 |
| 6                | 14.878037000            | 13.847734000 | 12.687571000 |
| 6                | 14.488826000            | 15.059872000 | 12.155424000 |
| 6                | 13.598786000            | 15.033904000 | 11.082514000 |
| 6                | 13.246601000            | 13.783814000 | 10.562679000 |
| 6                | 13.654379000            | 12.513646000 | 11.047064000 |
| 6                | 9.700012000             | 9.303624000  | 7.093868000  |
| 1                | 9.411651000             | 8.609340000  | 6.311575000  |
| 1                | 9.361275000             | 10.309165000 | 6.855571000  |
| 1                | 9.284085000             | 8.986108000  | 8.049606000  |
| 6                | 12.422167000            | 4.554614000  | 11.202582000 |
| 1                | 12.176706000            | 3.725368000  | 10.547081000 |
| 1                | 11.531377000            | 5.149349000  | 11.404204000 |
| 1                | 12.844681000            | 4.189087000  | 12.136371000 |
| 6                | 15.828294000            | 4.545625000  | 12.282877000 |
| 1                | 16.058084000            | 3.741295000  | 12.973968000 |
| 1                | 16.732386000            | 5.105715000  | 12.044376000 |
| 1                | 15.385319000            | 4.150125000  | 11.371485000 |
| 6                | 17.267836000            | 9.880874000  | 17.480843000 |
| 1                | 17.345716000            | 8.980238000  | 18.080486000 |
| 1                | 16.405804000            | 10.468331000 | 17.782172000 |
| 1                | 18.175619000            | 10.468429000 | 17.565256000 |
| 6                | 18.731746000            | 12.420840000 | 15.636566000 |
| 1                | 19.174272000            | 13.075403000 | 16.380606000 |
| 1                | 18.849502000            | 12.851374000 | 14.642157000 |
| 1                | 19.205562000            | 11.439460000 | 15.667906000 |
| 6                | 15.877959000            | 16.955186000 | 11.866612000 |
| 1                | 16.191854000            | 17.809741000 | 12.456834000 |
| 1                | 15.378736000            | 17.285550000 | 10.957599000 |
| 1                | 16.738101000            | 16.335115000 | 11.615531000 |
| 6                | 12.423281000            | 17.111956000 | 11.293204000 |
| 1                | 12.180870000            | 17.925158000 | 10.618503000 |
| 1                | 13.056051000            | 17.456593000 | 12.104916000 |
| 1                | 11.512452000            | 16.662502000 | 11.685108000 |
| 6                | 11.472202000            | 12.129107000 | 5.873038000  |
| 1                | 10.844429000            | 12.806816000 | 5.303713000  |
| 1                | 11.418724000            | 11.124000000 | 5.459449000  |
| 1                | 12.504245000            | 12.479361000 | 5.866546000  |

**Table S25.** The optimized Cartesian coordinates of the tetrathia[8]circulene **8** anion in the ground singlet state calculated at the B3LYP/DZP level of theory

| Atomic Number | X            | Coordinates (Angstroms)<br>Y | Z            |
|---------------|--------------|------------------------------|--------------|
| 16            | 12.110905000 | 13.812952000                 | 9.226777000  |
| 16            | 12.852640000 | 7.702246000                  | 8.966046000  |
| 16            | 15.176238000 | 7.876934000                  | 14.671972000 |
| 16            | 15.917739000 | 13.954061000                 | 14.062499000 |
| 8             | 10.987353000 | 12.106578000                 | 7.171187000  |
| 8             | 11.457925000 | 9.281674000                  | 6.968810000  |
| 8             | 13.527307000 | 5.359100000                  | 10.543024000 |
| 8             | 14.464037000 | 5.441514000                  | 13.252910000 |
| 8             | 16.556548000 | 9.539856000                  | 16.563680000 |
| 8             | 17.194261000 | 12.315485000                 | 16.148707000 |
| 8             | 14.945637000 | 16.299100000                 | 12.671002000 |
| 8             | 13.093032000 | 16.236808000                 | 10.481021000 |
| 6             | 13.066530000 | 11.511658000                 | 10.239151000 |
| 6             | 12.285071000 | 12.082208000                 | 9.179686000  |
| 6             | 11.729518000 | 11.407913000                 | 8.110455000  |
| 6             | 11.946326000 | 10.041917000                 | 8.020768000  |
| 6             | 12.660121000 | 9.431553000                  | 9.032500000  |
| 6             | 13.211184000 | 10.068147000                 | 10.194621000 |
| 6             | 13.734000000 | 9.064525000                  | 11.110856000 |
| 6             | 13.537963000 | 7.751824000                  | 10.565975000 |
| 6             | 13.773648000 | 6.551732000                  | 11.206036000 |
| 6             | 14.238287000 | 6.591489000                  | 12.511690000 |
| 6             | 14.493795000 | 7.827963000                  | 13.070886000 |
| 6             | 14.320746000 | 9.103998000                  | 12.437475000 |
| 6             | 14.864750000 | 10.156753000                 | 13.282979000 |
| 6             | 15.410998000 | 9.591875000                  | 14.481815000 |
| 6             | 16.153591000 | 10.248436000                 | 15.445274000 |
| 6             | 16.422928000 | 11.595268000                 | 15.246609000 |
| 6             | 15.819495000 | 12.217733000                 | 14.166350000 |
| 6             | 15.013275000 | 11.594187000                 | 13.156166000 |
| 6             | 14.463313000 | 12.599932000                 | 12.256115000 |
| 6             | 14.874646000 | 13.908501000                 | 12.673614000 |
| 6             | 14.473716000 | 15.112861000                 | 12.130633000 |
| 6             | 13.563540000 | 15.082910000                 | 11.086844000 |
| 6             | 13.169178000 | 13.849174000                 | 10.607478000 |
| 6             | 13.593609000 | 12.566740000                 | 11.094093000 |
| 6             | 10.041722000 | 9.063272000                  | 7.049539000  |
| 1             | 9.779666000  | 8.420898000                  | 6.210875000  |
| 1             | 9.500800000  | 10.007830000                 | 6.978391000  |
| 1             | 9.786301000  | 8.564725000                  | 7.987066000  |
| 6             | 12.327328000 | 4.709424000                  | 10.989125000 |
| 1             | 12.206041000 | 3.825051000                  | 10.366317000 |
| 1             | 11.466927000 | 5.369625000                  | 10.860169000 |
| 1             | 12.412686000 | 4.418782000                  | 12.036986000 |
| 6             | 15.649058000 | 4.739618000                  | 12.849075000 |
| 1             | 15.757340000 | 3.899069000                  | 13.532169000 |
| 1             | 16.522620000 | 5.390404000                  | 12.928028000 |
| 1             | 15.552567000 | 4.377527000                  | 11.824736000 |
| 6             | 17.950719000 | 9.232866000                  | 16.622284000 |
| 1             | 18.067806000 | 8.471380000                  | 17.391681000 |
| 1             | 18.534357000 | 10.112081000                 | 16.897051000 |
| 1             | 18.302398000 | 8.837227000                  | 15.666776000 |
| 6             | 18.506202000 | 12.632356000                 | 15.664555000 |
| 1             | 19.002159000 | 13.183095000                 | 16.461897000 |
| 1             | 18.464817000 | 13.252935000                 | 14.768188000 |
| 1             | 19.070541000 | 11.724801000                 | 15.438153000 |
| 6             | 15.899717000 | 16.958582000                 | 11.827133000 |
| 1             | 16.237259000 | 17.838453000                 | 12.371665000 |
| 1             | 15.440955000 | 17.257986000                 | 10.883771000 |
| 1             | 16.749949000 | 16.302297000                 | 11.627322000 |
| 6             | 12.160830000 | 16.959711000                 | 11.297543000 |
| 1             | 11.826405000 | 17.809097000                 | 10.704797000 |
| 1             | 12.638633000 | 17.309903000                 | 12.213376000 |
| 1             | 11.306010000 | 16.328397000                 | 11.549576000 |
| 6             | 11.669873000 | 12.269523000                 | 5.919120000  |
| 1             | 11.018411000 | 12.873903000                 | 5.290709000  |
| 1             | 11.850305000 | 11.302382000                 | 5.448333000  |
| 1             | 12.619425000 | 12.788135000                 | 6.068087000  |

**Table S26.** The optimized Cartesian coordinates of the tetraselena[8]circulene **9** in the ground singlet state calculated at the B3LYP/DZP level of theory

| Atomic Number | X            | Y            | Z             |
|---------------|--------------|--------------|---------------|
| 34            | 1.372865000  | 2.909599000  | -14.658941000 |
| 34            | 2.753746000  | 1.660619000  | -8.504805000  |
| 8             | 0.439649000  | 1.378861000  | -16.977805000 |
| 8             | 3.168543000  | 4.412744000  | -12.899782000 |
| 8             | 4.018201000  | 3.648648000  | -10.239821000 |
| 8             | 1.331393000  | 0.569554000  | -6.184813000  |
| 6             | 0.206171000  | 0.655028000  | -15.832775000 |
| 6             | 0.499343000  | 1.235420000  | -14.602597000 |
| 6             | 0.336553000  | 0.637810000  | -13.326660000 |
| 6             | 1.033523000  | 1.419830000  | -12.278671000 |
| 6             | 1.683847000  | 2.551879000  | -12.831442000 |
| 6             | 2.642510000  | 3.346504000  | -12.209369000 |
| 6             | 3.031804000  | 2.995403000  | -10.941237000 |
| 6             | 2.355734000  | 1.945302000  | -10.327911000 |
| 6             | 1.302387000  | 1.176839000  | -10.882972000 |
| 6             | 0.599868000  | 0.399154000  | -9.835687000  |
| 6             | 1.179526000  | 0.618483000  | -8.559870000  |
| 6             | 0.632055000  | 0.268479000  | -7.329444000  |
| 6             | -0.749472000 | 1.655899000  | -17.745670000 |
| 1             | -0.425946000 | 2.254296000  | -18.592747000 |
| 1             | -1.211030000 | 0.732215000  | -18.092026000 |
| 1             | -1.460521000 | 2.221030000  | -17.141543000 |
| 6             | 4.555463000  | 4.249033000  | -13.265559000 |
| 1             | 4.817294000  | 5.129578000  | -13.845509000 |
| 1             | 5.183431000  | 4.181316000  | -12.378523000 |
| 1             | 4.676928000  | 3.353321000  | -13.875944000 |
| 6             | 3.652188000  | 4.983789000  | -9.829843000  |
| 1             | 4.485099000  | 5.353557000  | -9.238372000  |
| 1             | 3.491647000  | 5.623440000  | -10.696805000 |
| 1             | 2.748872000  | 4.952790000  | -9.219423000  |
| 6             | 1.718230000  | -0.587340000 | -5.415007000  |
| 1             | 2.282355000  | -0.207930000 | -4.567715000  |
| 1             | 0.841825000  | -1.133683000 | -5.069360000  |
| 1             | 2.348880000  | -1.242583000 | -6.017285000  |
| 34            | -1.372865000 | -2.909599000 | -14.658941000 |
| 34            | -2.753746000 | -1.660619000 | -8.504805000  |
| 8             | -0.439649000 | -1.378861000 | -16.977805000 |
| 8             | -3.168543000 | -4.412744000 | -12.899782000 |
| 8             | -4.018201000 | -3.648648000 | -10.239821000 |
| 8             | -1.331393000 | -0.569554000 | -6.184813000  |
| 6             | -0.206171000 | -0.655028000 | -15.832775000 |
| 6             | -0.499343000 | -1.235420000 | -14.602597000 |
| 6             | -0.336553000 | -0.637810000 | -13.326660000 |
| 6             | -1.033523000 | -1.419830000 | -12.278671000 |
| 6             | -1.683847000 | -2.551879000 | -12.831442000 |
| 6             | -2.642510000 | -3.346504000 | -12.209369000 |
| 6             | -3.031804000 | -2.995403000 | -10.941237000 |
| 6             | -2.355734000 | -1.945302000 | -10.327911000 |
| 6             | -1.302387000 | -1.176839000 | -10.882972000 |
| 6             | -0.599868000 | -0.399154000 | -9.835687000  |
| 6             | -1.179526000 | -0.618483000 | -8.559870000  |
| 6             | -0.632055000 | -0.268479000 | -7.329444000  |
| 6             | 0.749472000  | -1.655899000 | -17.745670000 |
| 1             | 0.425946000  | -2.254296000 | -18.592747000 |
| 1             | 1.211030000  | -0.732215000 | -18.092026000 |
| 1             | 1.460521000  | -2.221030000 | -17.141543000 |
| 6             | -4.555463000 | -4.249033000 | -13.265559000 |
| 1             | -4.817294000 | -5.129578000 | -13.845509000 |
| 1             | -5.183431000 | -4.181316000 | -12.378523000 |
| 1             | -4.676928000 | -3.353321000 | -13.875944000 |
| 6             | -3.652188000 | -4.983789000 | -9.829843000  |
| 1             | -4.485099000 | -5.353557000 | -9.238372000  |
| 1             | -3.491647000 | -5.623440000 | -10.696805000 |
| 1             | -2.748872000 | -4.952790000 | -9.219423000  |
| 6             | -1.718230000 | 0.587340000  | -5.415007000  |
| 1             | -2.282355000 | 0.207930000  | -4.567715000  |
| 1             | -0.841825000 | 1.133683000  | -5.069360000  |
| 1             | -2.348880000 | 1.242583000  | -6.017285000  |

**Table S27.** The optimized Cartesian coordinates of the tetraselena[8]circulene **9** cation in the ground singlet state calculated at the B3LYP/DZP level of theory

| Atomic<br>Number | Coordinates (Angstroms) |              |               |
|------------------|-------------------------|--------------|---------------|
|                  | X                       | Y            | Z             |
| 34               | 1.347383000             | 2.923403000  | -14.666799000 |
| 34               | 2.841609000             | 1.534066000  | -8.558851000  |
| 8                | 0.418419000             | 1.395909000  | -16.977986000 |
| 8                | 3.118906000             | 4.404148000  | -12.891120000 |
| 8                | 4.047103000             | 3.581245000  | -10.255419000 |
| 8                | 1.376259000             | 0.459378000  | -6.260162000  |
| 6                | 0.193611000             | 0.662247000  | -15.850873000 |
| 6                | 0.485584000             | 1.247520000  | -14.620245000 |
| 6                | 0.333562000             | 0.645766000  | -13.343766000 |
| 6                | 1.019554000             | 1.414461000  | -12.309858000 |
| 6                | 1.653546000             | 2.561294000  | -12.842604000 |
| 6                | 2.633599000             | 3.335158000  | -12.216074000 |
| 6                | 3.060025000             | 2.946071000  | -10.954497000 |
| 6                | 2.405374000             | 1.883555000  | -10.356167000 |
| 6                | 1.312938000             | 1.138389000  | -10.909469000 |
| 6                | 0.623158000             | 0.382788000  | -9.890207000  |
| 6                | 1.229120000             | 0.549424000  | -8.608384000  |
| 6                | 0.665079000             | 0.221819000  | -7.390456000  |
| 6                | -0.746301000            | 1.608327000  | -17.815356000 |
| 1                | -0.399476000            | 2.204913000  | -18.652756000 |
| 1                | -1.149871000            | 0.660908000  | -18.165823000 |
| 1                | -1.504364000            | 2.154152000  | -17.254148000 |
| 6                | 4.548875000             | 4.416897000  | -13.153442000 |
| 1                | 4.727126000             | 5.325058000  | -13.718972000 |
| 1                | 5.116797000             | 4.422433000  | -12.227864000 |
| 1                | 4.811359000             | 3.544050000  | -13.749708000 |
| 6                | 3.690288000             | 4.909256000  | -9.788931000  |
| 1                | 4.543124000             | 5.256561000  | -9.214703000  |
| 1                | 3.501950000             | 5.575588000  | -10.628690000 |
| 1                | 2.807382000             | 4.852556000  | -9.152719000  |
| 6                | 1.608018000             | -0.693039000 | -5.405175000  |
| 1                | 2.167230000             | -0.314873000 | -4.556323000  |
| 1                | 0.667979000             | -1.130574000 | -5.078704000  |
| 1                | 2.199581000             | -1.429373000 | -5.947619000  |
| 34               | -1.347254000            | -2.923438000 | -14.666911000 |
| 34               | -2.841535000            | -1.533962000 | -8.559035000  |
| 8                | -0.418429000            | -1.395800000 | -16.978028000 |
| 8                | -3.118855000            | -4.404227000 | -12.891136000 |
| 8                | -4.047040000            | -3.581215000 | -10.255585000 |
| 8                | -1.376419000            | -0.459025000 | -6.260319000  |
| 6                | -0.193432000            | -0.662244000 | -15.850889000 |
| 6                | -0.485360000            | -1.247595000 | -14.620287000 |
| 6                | -0.333244000            | -0.645940000 | -13.343804000 |
| 6                | -1.019258000            | -1.414648000 | -12.309904000 |
| 6                | -1.653385000            | -2.561379000 | -12.842701000 |
| 6                | -2.633459000            | -3.335224000 | -12.216158000 |
| 6                | -3.059845000            | -2.946149000 | -10.954601000 |
| 6                | -2.405111000            | -1.883679000 | -10.356250000 |
| 6                | -1.312628000            | -1.138593000 | -10.909524000 |
| 6                | -0.622839000            | -0.383020000 | -9.890221000  |
| 6                | -1.228958000            | -0.549461000 | -8.608494000  |
| 6                | -0.665053000            | -0.221706000 | -7.390536000  |
| 6                | 0.746128000             | -1.608163000 | -17.815639000 |
| 1                | 0.399093000             | -2.204510000 | -18.653120000 |
| 1                | 1.149764000             | -0.660715000 | -18.165942000 |
| 1                | 1.504205000             | -2.154220000 | -17.254676000 |
| 6                | -4.548922000            | -4.417066000 | -13.152876000 |
| 1                | -4.727333000            | -5.325189000 | -13.718418000 |
| 1                | -5.116445000            | -4.422765000 | -12.227046000 |
| 1                | -4.811753000            | -3.544186000 | -13.748942000 |
| 6                | -3.690607000            | -4.909497000 | -9.789584000  |
| 1                | -4.543448000            | -5.256679000 | -9.215290000  |
| 1                | -3.502680000            | -5.575635000 | -10.629588000 |
| 1                | -2.807548000            | -4.853307000 | -9.153539000  |
| 6                | -1.608056000            | 0.693495000  | -5.405435000  |
| 1                | -2.167154000            | 0.315436000  | -4.556461000  |
| 1                | -0.667971000            | 1.131071000  | -5.079161000  |
| 1                | -2.199696000            | 1.429753000  | -5.947899000  |

**Table S28.** The optimized Cartesian coordinates of the tetraselena[8]circulene **9** anion in the ground singlet state calculated at the B3LYP/DZP level of theory

| Atomic<br>Number | Coordinates (Angstroms) |              |               |
|------------------|-------------------------|--------------|---------------|
|                  | X                       | Y            | Z             |
| 34               | 1.283716000             | 2.968308000  | -14.637521000 |
| 34               | 2.826359000             | 1.568185000  | -8.521381000  |
| 8                | 0.410376000             | 1.373839000  | -16.991939000 |
| 8                | 3.151500000             | 4.448240000  | -12.865602000 |
| 8                | 4.057185000             | 3.632622000  | -10.263164000 |
| 8                | 1.321512000             | 0.551964000  | -6.163189000  |
| 6                | 0.194745000             | 0.666789000  | -15.818577000 |
| 6                | 0.461644000             | 1.256626000  | -14.604045000 |
| 6                | 0.331873000             | 0.647618000  | -13.313337000 |
| 6                | 1.019338000             | 1.416696000  | -12.279870000 |
| 6                | 1.654377000             | 2.582834000  | -12.816412000 |
| 6                | 2.615038000             | 3.354417000  | -12.201849000 |
| 6                | 3.045611000             | 2.966138000  | -10.940063000 |
| 6                | 2.393421000             | 1.915038000  | -10.336337000 |
| 6                | 1.303840000             | 1.159190000  | -10.876101000 |
| 6                | 0.611023000             | 0.394126000  | -9.843501000  |
| 6                | 1.204126000             | 0.582798000  | -8.552539000  |
| 6                | 0.643487000             | 0.261184000  | -7.337389000  |
| 6                | -0.807290000            | 1.703292000  | -17.674984000 |
| 1                | -0.523421000            | 2.298307000  | -18.541038000 |
| 1                | -1.327142000            | 0.800744000  | -17.998617000 |
| 1                | -1.461622000            | 2.288382000  | -17.024954000 |
| 6                | 4.481442000             | 4.210938000  | -13.354469000 |
| 1                | 4.769960000             | 5.103969000  | -13.905584000 |
| 1                | 5.171732000             | 4.044854000  | -12.526604000 |
| 1                | 4.491609000             | 3.348076000  | -14.023180000 |
| 6                | 3.637408000             | 4.908253000  | -9.751579000  |
| 1                | 4.481375000             | 5.308791000  | -9.193316000  |
| 1                | 3.376566000             | 5.582849000  | -10.567967000 |
| 1                | 2.781688000             | 4.786521000  | -9.084514000  |
| 6                | 1.791919000             | -0.621038000 | -5.485717000  |
| 1                | 2.341634000             | -0.273790000 | -4.612851000  |
| 1                | 0.956735000             | -1.249268000 | -5.172818000  |
| 1                | 2.457605000             | -1.194107000 | -6.134927000  |
| 34               | -1.283716000            | -2.968308000 | -14.637521000 |
| 34               | -2.826359000            | -1.568185000 | -8.521381000  |
| 8                | -0.410376000            | -1.373839000 | -16.991939000 |
| 8                | -3.151500000            | -4.448240000 | -12.865602000 |
| 8                | -4.057185000            | -3.632622000 | -10.263164000 |
| 8                | -1.321512000            | -0.551964000 | -6.163189000  |
| 6                | -0.194745000            | -0.666789000 | -15.818577000 |
| 6                | -0.461644000            | -1.256626000 | -14.604045000 |
| 6                | -0.331873000            | -0.647618000 | -13.313337000 |
| 6                | -1.019338000            | -1.416696000 | -12.279870000 |
| 6                | -1.654377000            | -2.582834000 | -12.816412000 |
| 6                | -2.615038000            | -3.354417000 | -12.201849000 |
| 6                | -3.045611000            | -2.966138000 | -10.940063000 |
| 6                | -2.393421000            | -1.915038000 | -10.336337000 |
| 6                | -1.303840000            | -1.159190000 | -10.876101000 |
| 6                | -0.611023000            | -0.394126000 | -9.843501000  |
| 6                | -1.204126000            | -0.582798000 | -8.552539000  |
| 6                | -0.643487000            | -0.261184000 | -7.337389000  |
| 6                | 0.807290000             | -1.703292000 | -17.674984000 |
| 1                | 0.523421000             | -2.298307000 | -18.541038000 |
| 1                | 1.327142000             | -0.800744000 | -17.998617000 |
| 1                | 1.461622000             | -2.288382000 | -17.024954000 |
| 6                | -4.481442000            | -4.210938000 | -13.354469000 |
| 1                | -4.769960000            | -5.103969000 | -13.905584000 |
| 1                | -5.171732000            | -4.044854000 | -12.526604000 |
| 1                | -4.491609000            | -3.348076000 | -14.023180000 |
| 6                | -3.637408000            | -4.908253000 | -9.751579000  |
| 1                | -4.481375000            | -5.308791000 | -9.193316000  |
| 1                | -3.376566000            | -5.582849000 | -10.567967000 |
| 1                | -2.781688000            | -4.786521000 | -9.084514000  |
| 6                | -1.791919000            | 0.621038000  | -5.485717000  |
| 1                | -2.341634000            | 0.273790000  | -4.612851000  |
| 1                | -0.956735000            | 1.249268000  | -5.172818000  |
| 1                | -2.457605000            | 1.194107000  | -6.134927000  |
